# Supplementary material for: Design and optimization of piperidine-substituted thiophene[3,2-d]pyrimidine-based HIV-1 NNRTIs with improved drug resistance and pharmacokinetic profiles
Source: PubMed Central journal article supplement — Acta Pharm Sin B. 2024 Mar 27;14(7):3110–24. doi: 10.1016/j.apsb.2024.03.021 (PMC11252457; doi:10.1016/j.apsb.2024.03.021), 2024-03-27
Supplement: mmc1.pdf [file mmc1.pdf]

## Supporting Information for

### Original article

# Design and optimization of piperidine-substituted thiophene[3,2-*d*]pyrimidine-based HIV-1 NNRTIs with improved drug resistance and pharmacokinetic profiles

Yanying Sun<sup>a</sup>, Zhenzhen Zhou<sup>a</sup>, Zhongling Shi<sup>a</sup>, Fabao Zhao<sup>a</sup>, Minghui Xie<sup>a</sup>, Zongji Zhuo<sup>a</sup>, Erik De Clercq<sup>b</sup>, Christophe Pannecouque<sup>b</sup>, Dongwei Kang<sup>a,c,\*</sup>, Peng Zhan<sup>a,c,\*</sup>, Xinyong Liu<sup>a,c,\*</sup>

<sup>a</sup>*Department of Medicinal Chemistry, Key Laboratory of Chemical Biology (Ministry of Education), School of Pharmaceutical Sciences, Shandong University, Jinan 250012, China*

<sup>b</sup>*Rega Institute for Medical Research, Laboratory of Virology and Chemotherapy, K.U. Leuven, Leuven B-3000, Belgium*

<sup>c</sup>*China-Belgium Collaborative Research Center for Innovative Antiviral Drugs of Shandong Province, Jinan 250012, China*

Received 18 November 2023; received in revised form 26 February 2024; accepted 11 March 2024

\*Corresponding authors.

E-mail addresses: [kangdongwei@sdu.edu.cn](mailto:kangdongwei@sdu.edu.cn) (Dongwei Kang); [zhanpeng1982@sdu.edu.cn](mailto:zhanpeng1982@sdu.edu.cn) (Peng Zhan); [xinyongl@sdu.edu.cn](mailto:xinyongl@sdu.edu.cn) (Xinyong Liu).

†These authors made equal contributions to this work.

## Contents

1. Water solubility measurement
2. Pharmacokinetics assays
3. Acute toxicity experiment
4. Subacute toxicity experiment
5. Experimental details,  $^1\text{H}$  and  $^{13}\text{C}$  NMR spectra, HRMS spectra, and HPLC traces

### 1. Water solubility measurement.

Compound **15a** and its hydrochloride form **15a·HCl** (0.1, 1, 10 mg) were dissolved in deionized water (pH = 2.0, 7.0, and 7.4) until the solution was clear. The assays were measured at least in duplicate.

### 2. Pharmacokinetics assays.

6 male Sprague Dawley rats were randomly divided into 2 groups, which was performed to tail vein injection ( $2 \text{ mg}\cdot\text{kg}^{-1}$ ) and oral administration ( $10 \text{ mg}\cdot\text{kg}^{-1}$ ), respectively. The solution of compound **15a·HCl** was prepared by dissolving in a mixture of PEG400/normal saline (70/30, V/V). Blood samples of the intravenous group were collected from the retrobulbar vein into heparinized centrifugation tubes at 5 min, 15 min, 30 min, 1 h, 2 h, 4 h, 8 h and 12 h after dosing, and blood samples of the oral administration group were collected at 15 min, 30 min, 1 h, 2 h, 4 h, 8 h, 10 h, and 12 h after dosing. All the samples were centrifuged at 8000 rpm for 8 min to separate plasma. LC-MS/MS analysis was used to determine the concentration of **15a·HCl** in plasma. Briefly,  $50 \mu\text{L}$  of plasma was added to  $50 \mu\text{L}$  of internal standard and  $300 \mu\text{L}$  of methanol in a 5 mL centrifugation tube, which was centrifuged at 3000g for 10 min. The supernatant layer was collected and a  $20 \mu\text{L}$  aliquot was injected for LC-MS/MS analysis. Standard curves for **15a·HCl** in blood were generated by the

addition of various concentrations of **15a·HCl** together with internal standard to blank plasma. Then all samples were quantified with an Agilent 1200 LC/MSD (Agilent, USA).

### **3. Acute toxicity experiment.**

Twenty Kunming mice (18-20 g) were purchased from the animal experimental center of Shandong University and divided into two groups. Compound **15a·HCl** was suspended in PEG-400/normal saline (70/30, V/V) and normal saline at concentrations of 100 mg·mL<sup>-1</sup>. After the mice had been fasted for 12 h, they were administered intragastrical by gavage (2000 mg/kg).

### **4. Subacute toxicity experiment.**

A batch of eight Kunming mice (purchased from the animal experimental center of Shandong University) was randomly divided into four groups (n = 4): control group and test group. All mice were deprived of feed for 12 h and then the mice in the test groups were given 50 mg·kg<sup>-1</sup> p.o. of **15a·HCl** every two days for 14 days, while the mice in control groups received the same volume of vehicle solution. The mice were weighed before each dosing. All the mice were killed and dissected at Day 14, and the heart, liver, spleen, lung, and kidney were extracted. These organs were examined by HE staining.

### **5. Experimental details, <sup>1</sup>H and <sup>13</sup>C NMR spectra, and HRMS spectra.**

*4-((2-((1-(4-(dimethylphosphoryl)benzyl)piperidin-4-yl)amino)thieno[3,2-d]pyrimidin-4-yl)oxy)-3,5-dimethylbenzotrile (9a)*

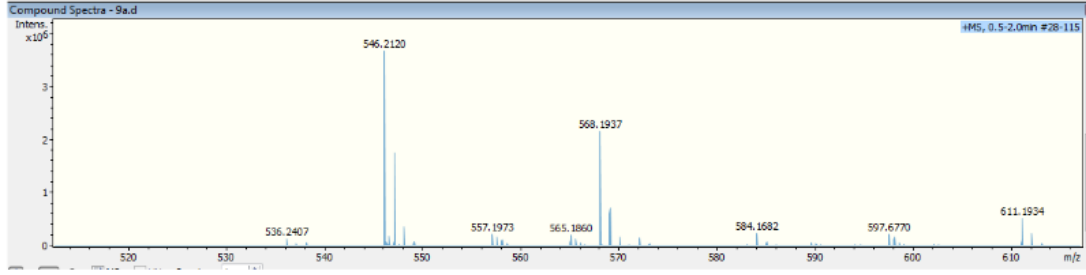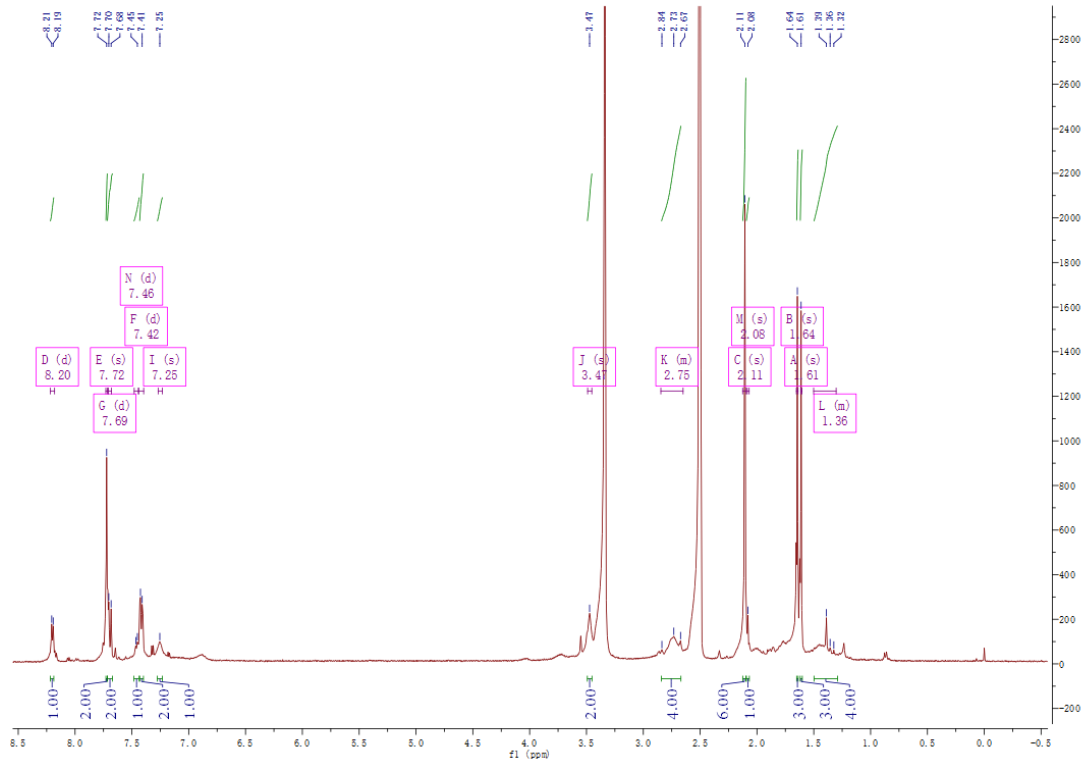

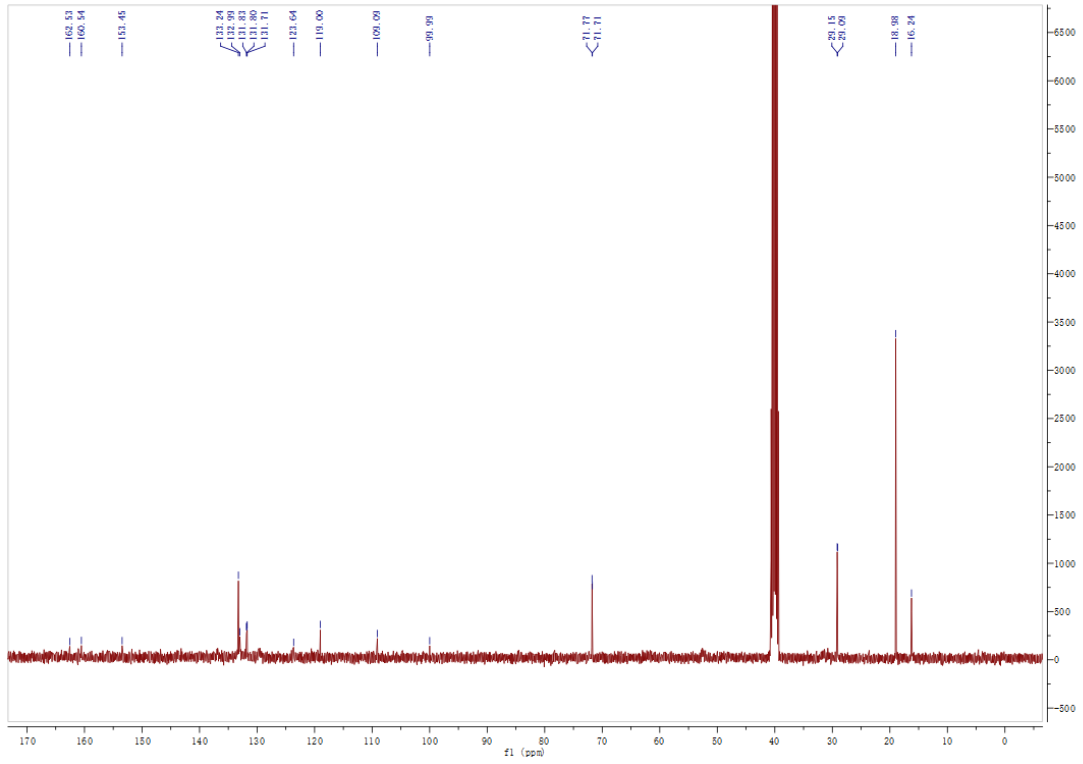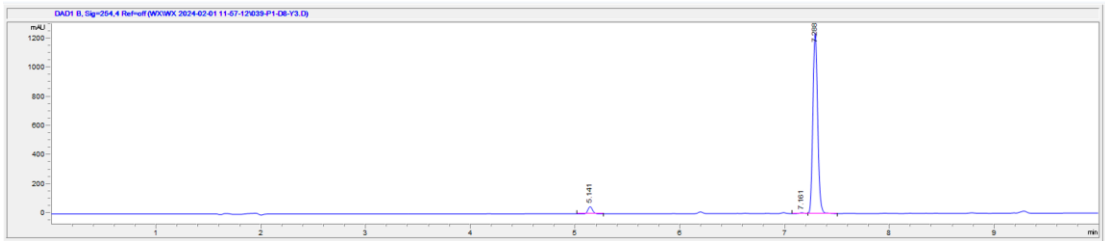

| # | 时间    | 峰面积    | 峰高     | 峰宽     | 峰面积 %  | 对称因子  | 类型   |
|---|-------|--------|--------|--------|--------|-------|------|
| 1 | 5.141 | 149.3  | 48.9   | 0.0496 | 3.630  | 0.877 | BB   |
| 2 | 7.161 | 16.5   | 4.8    | 0.0539 | 0.401  | 1.007 | VV E |
| 3 | 7.288 | 3946.8 | 1243.5 | 0.051  | 95.970 | 0.897 | VB R |

**dimethyl (4-((4-((4-(4-cyano-2,6-dimethylphenoxy)thieno[3,2-d]pyrimidin-2-yl)amino)piperidin-1-yl)methyl)phenyl)phosphonate (9b)**

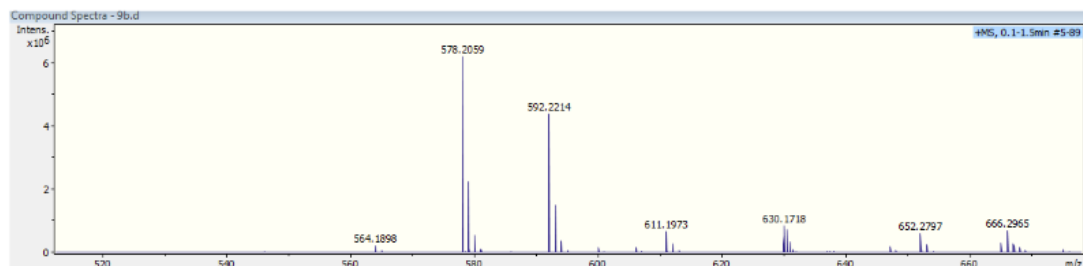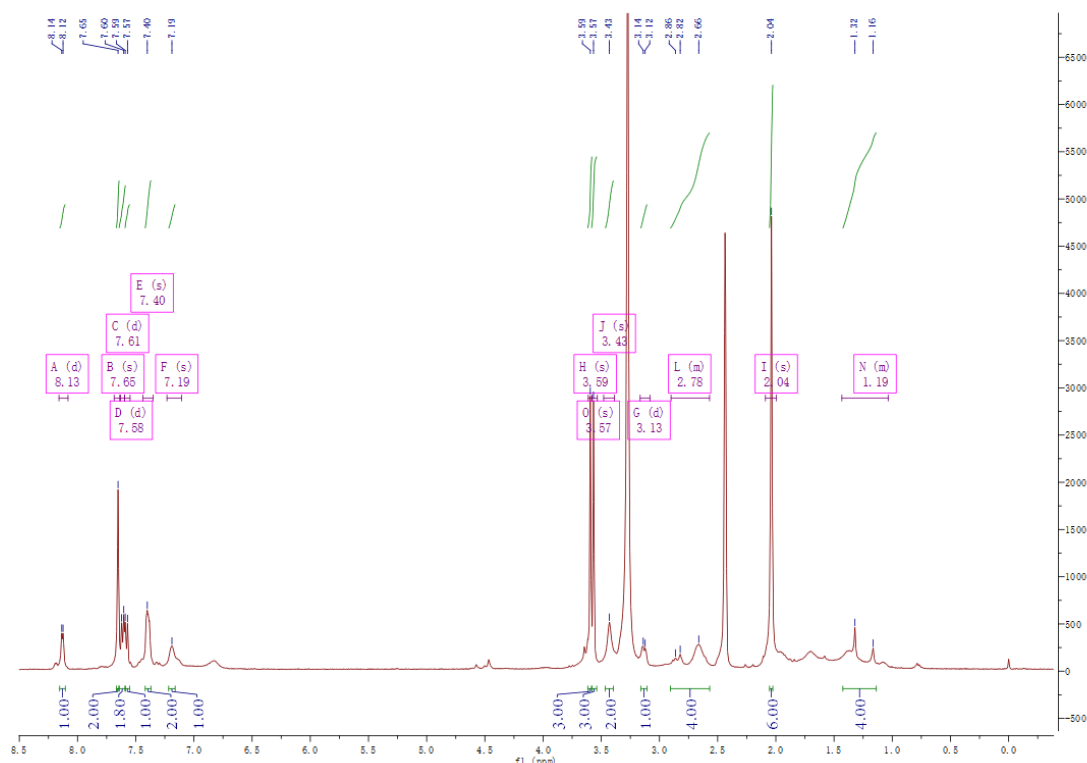

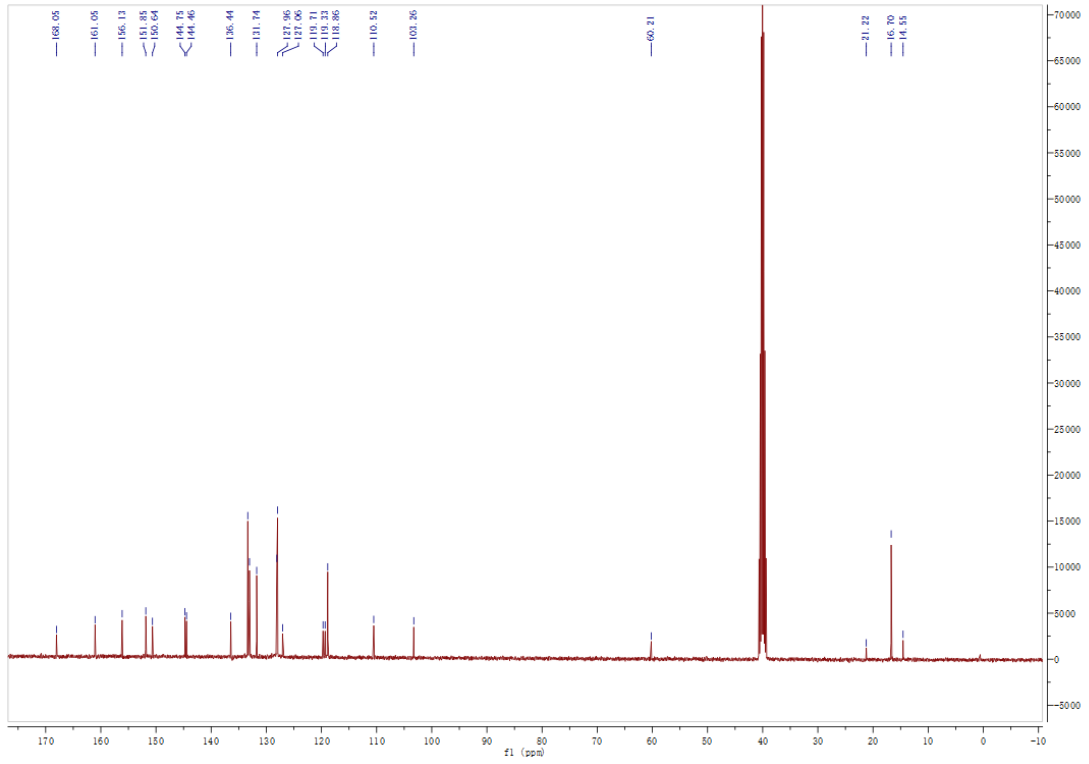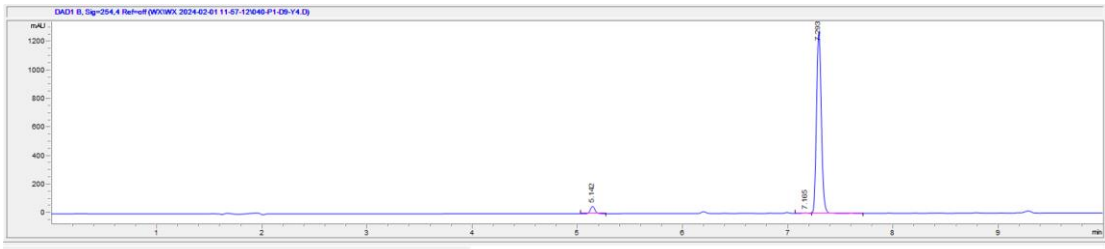

| # | 时间    | 峰面积   | 峰高     | 峰宽     | 峰面积%   | 对称因子  | 类型   |
|---|-------|-------|--------|--------|--------|-------|------|
| 1 | 5.142 | 194.8 | 50.7   | 0.0496 | 3.644  | 0.879 | BB   |
| 2 | 7.165 | 15.2  | 4.1    | 0.0554 | 0.358  | 1.138 | WV E |
| 3 | 7.293 | 4077  | 1278.2 | 0.0492 | 95.998 | 0.898 | WV R |

**diethyl (4-((4-((4-(4-cyano-2,6-dimethylphenoxy)thieno[3,2-d]pyrimidin-2-yl)amino)piperidin-1-yl)methyl)phenyl)phosphonate (9c)**

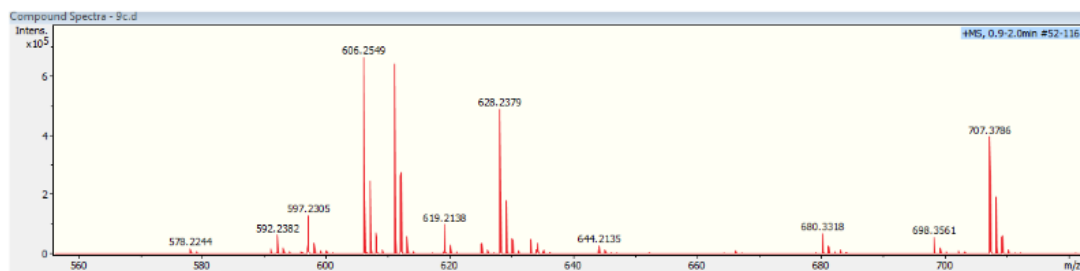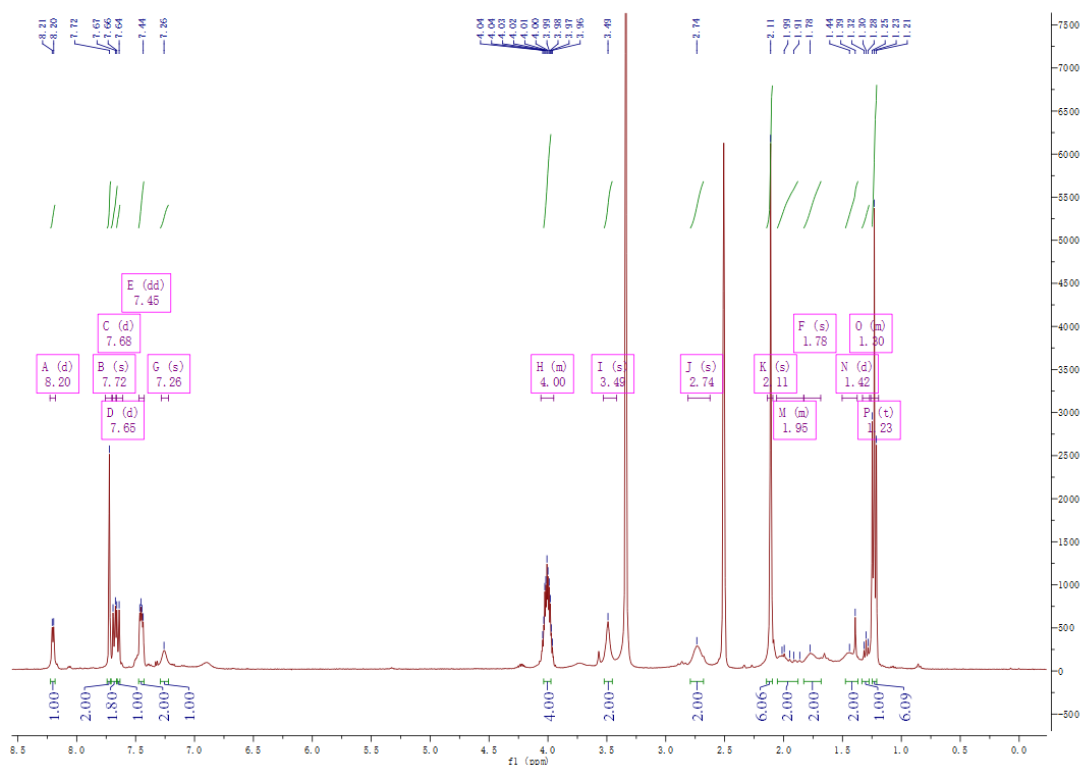



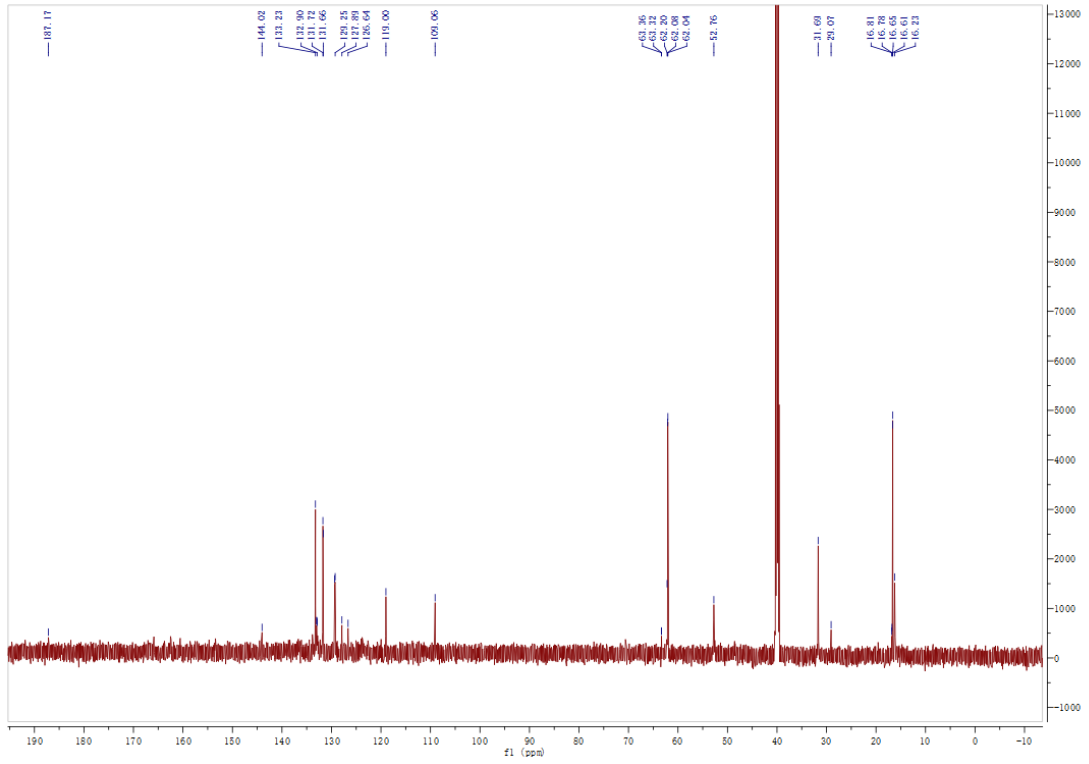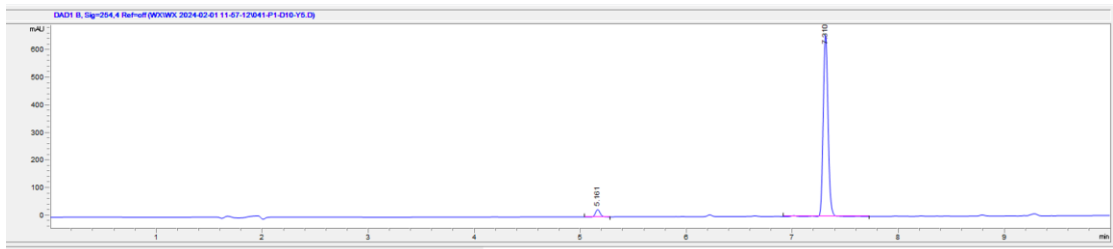

| # | 时间    | 峰面积    | 峰高    | 峰宽     | 峰面积%   | 对数因子  | 类型   |
|---|-------|--------|-------|--------|--------|-------|------|
| 1 | 5.161 | 80.7   | 26.5  | 0.0476 | 3.666  | 0.893 | BB   |
| 2 | 7.31  | 2119.5 | 661.7 | 0.051  | 96.334 | 0.912 | BB R |

**dibutyl (4-((4-((4-(4-cyano-2,6-dimethylphenoxy)thieno[3,2-d]pyrimidin-2-yl)amino)piperidin-1-yl)methyl)phenyl)phosphonate (9d)**

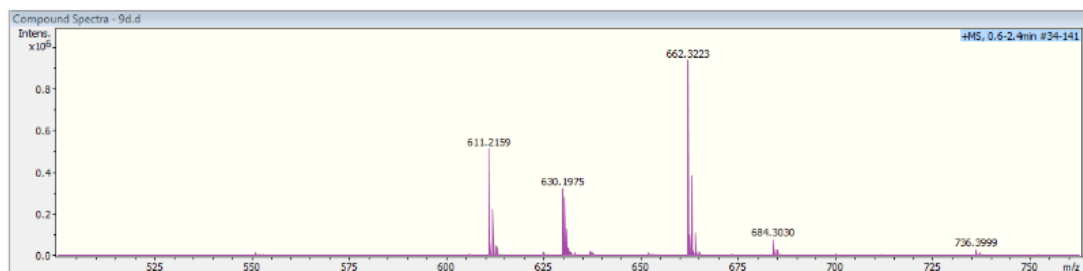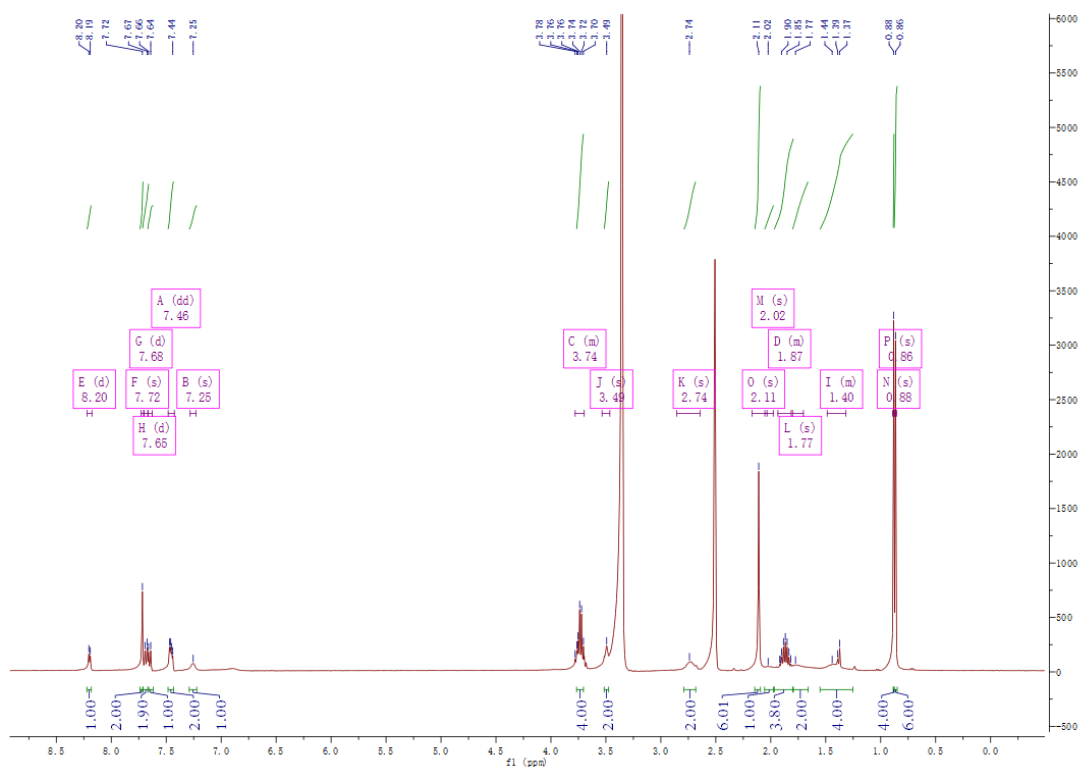

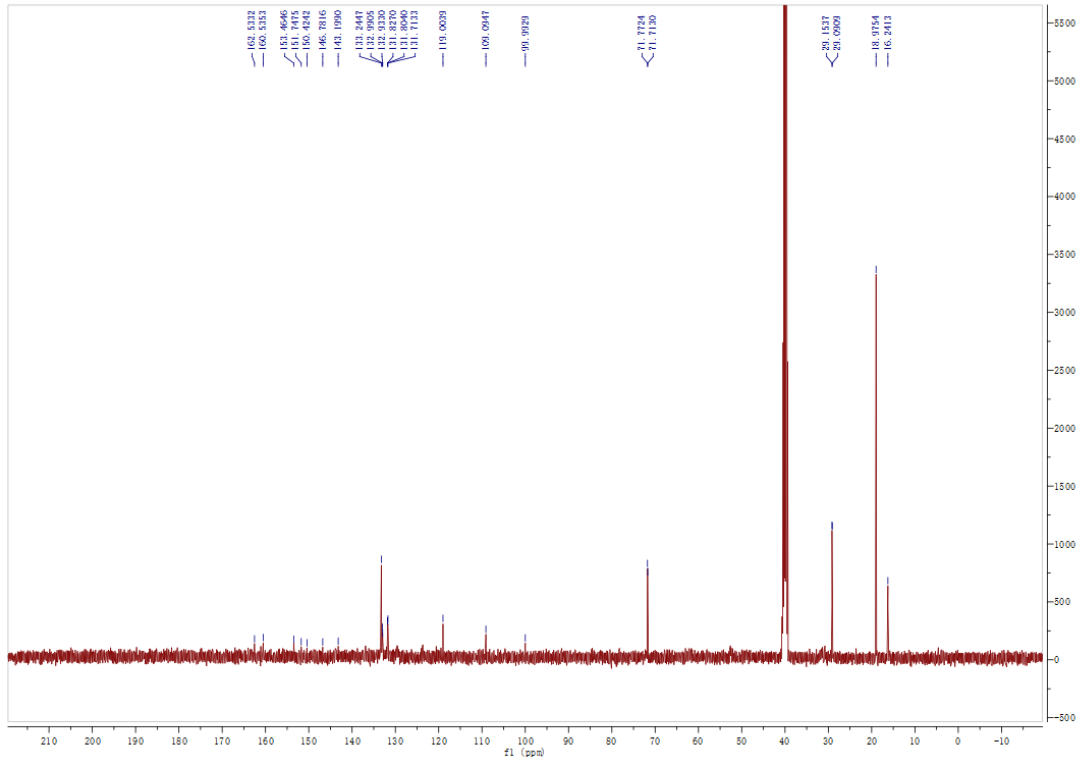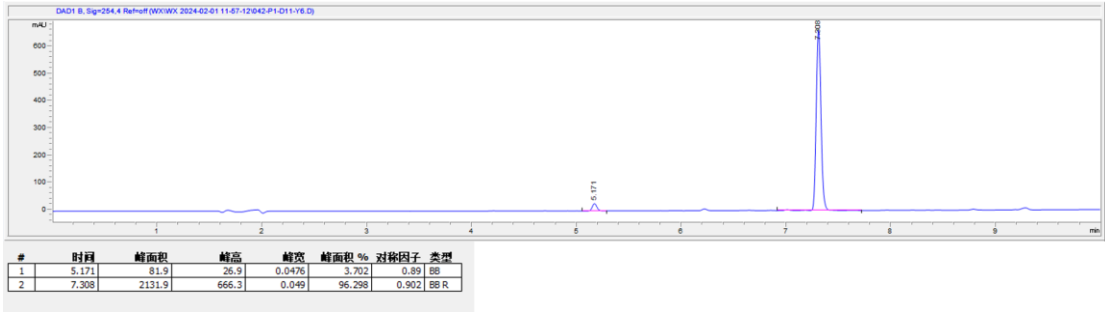

*bis(2,2,2-trifluoroethyl) (4-((4-((4-(4-cyano-2,6-dimethylphenoxy)thieno[3,2-d]pyrimidin-2-yl)amino)piperidin-1-yl)methyl)phenyl)phosphonate (9e)*

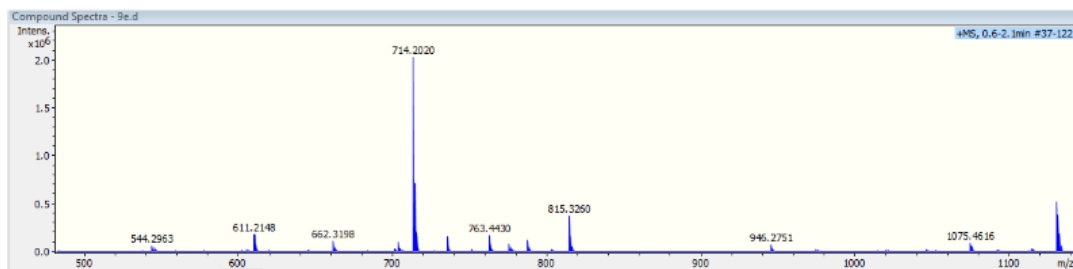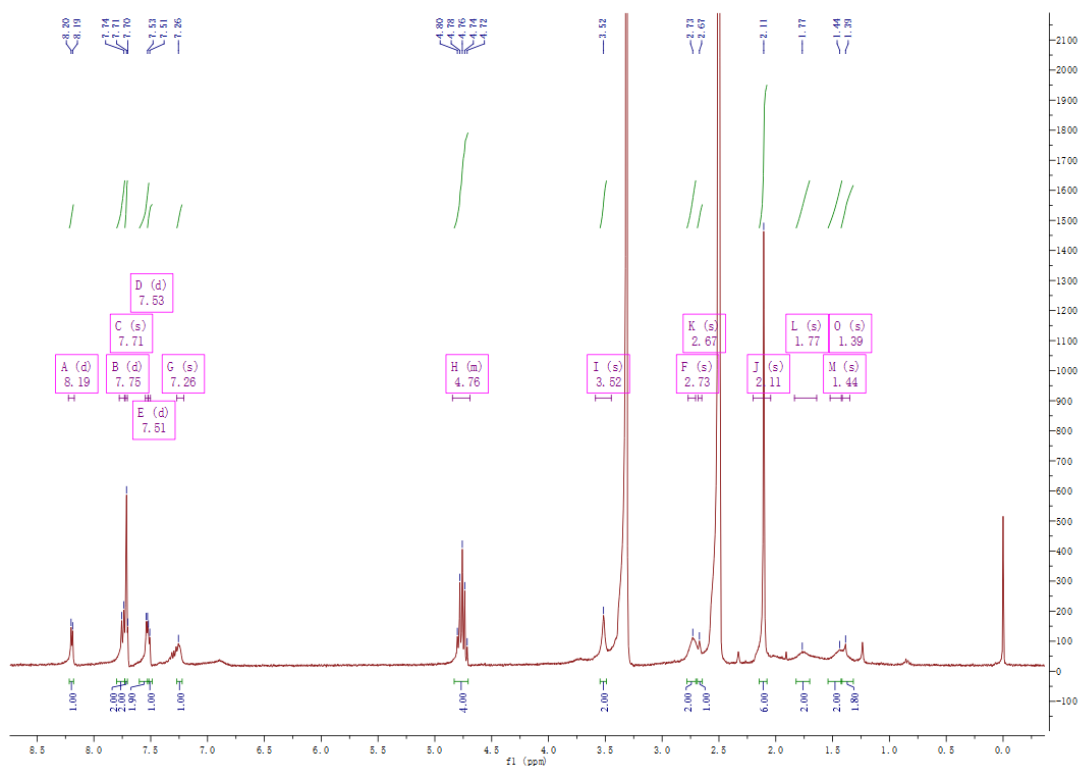

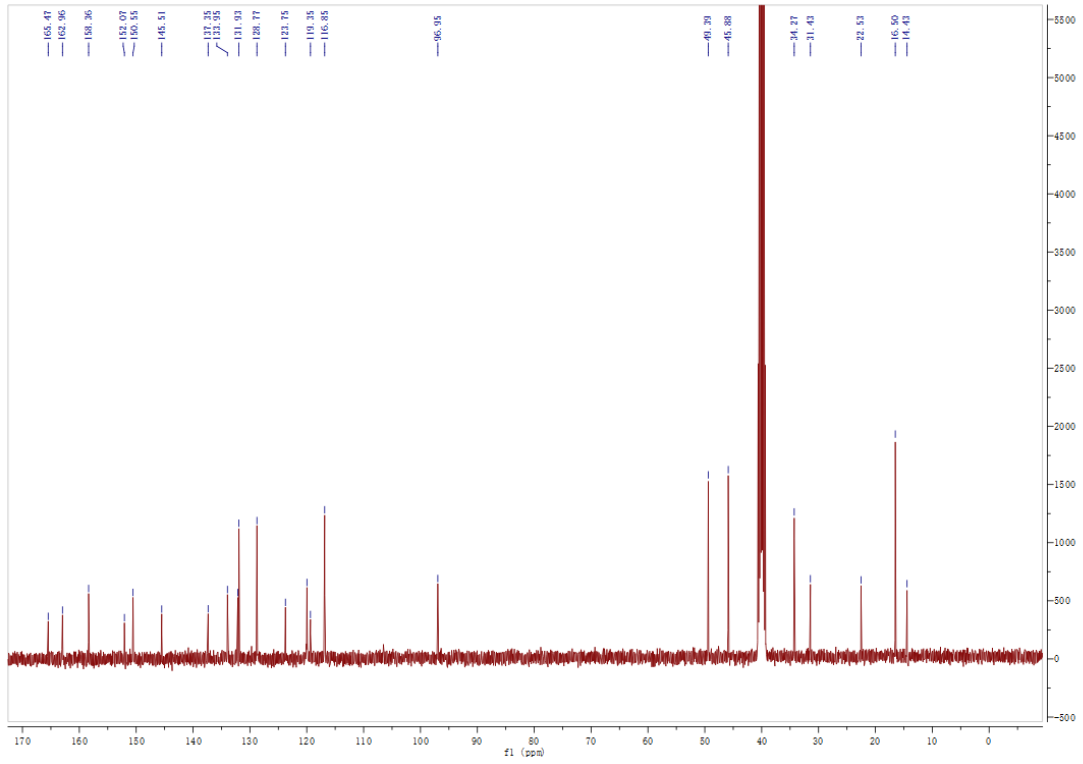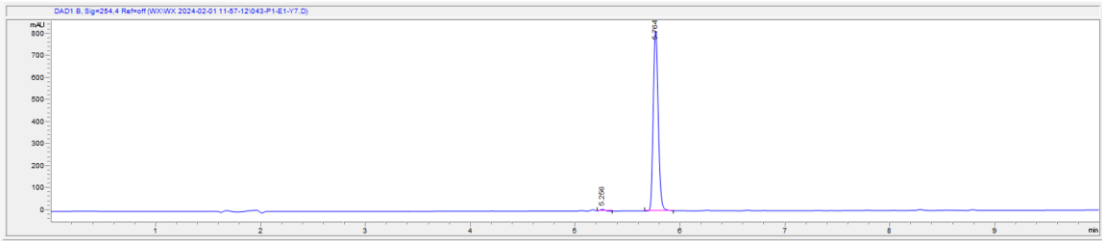

| # | 时间    | 峰面积    | 峰高    | 峰宽     | 峰面积 %  | 对称因子  | 类型 |
|---|-------|--------|-------|--------|--------|-------|----|
| 1 | 5.256 | 25.4   | 7.8   | 0.0499 | 0.931  | 0.949 | VB |
| 2 | 5.764 | 2705.7 | 826.9 | 0.0502 | 99.069 | 0.838 | BB |

*diisopropyl 4-((4-((4-(4-cyano-2,6-dimethylphenoxy)thieno[3,2-d]pyrimidin-2-yl)amino)piperidin-1-yl)methyl)phenyl)phosphonate (9f)*

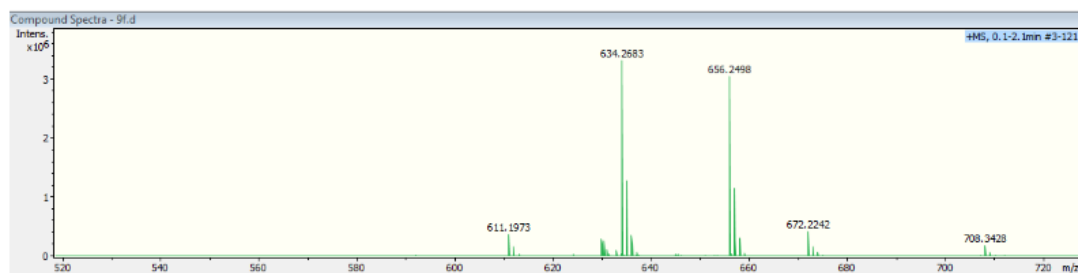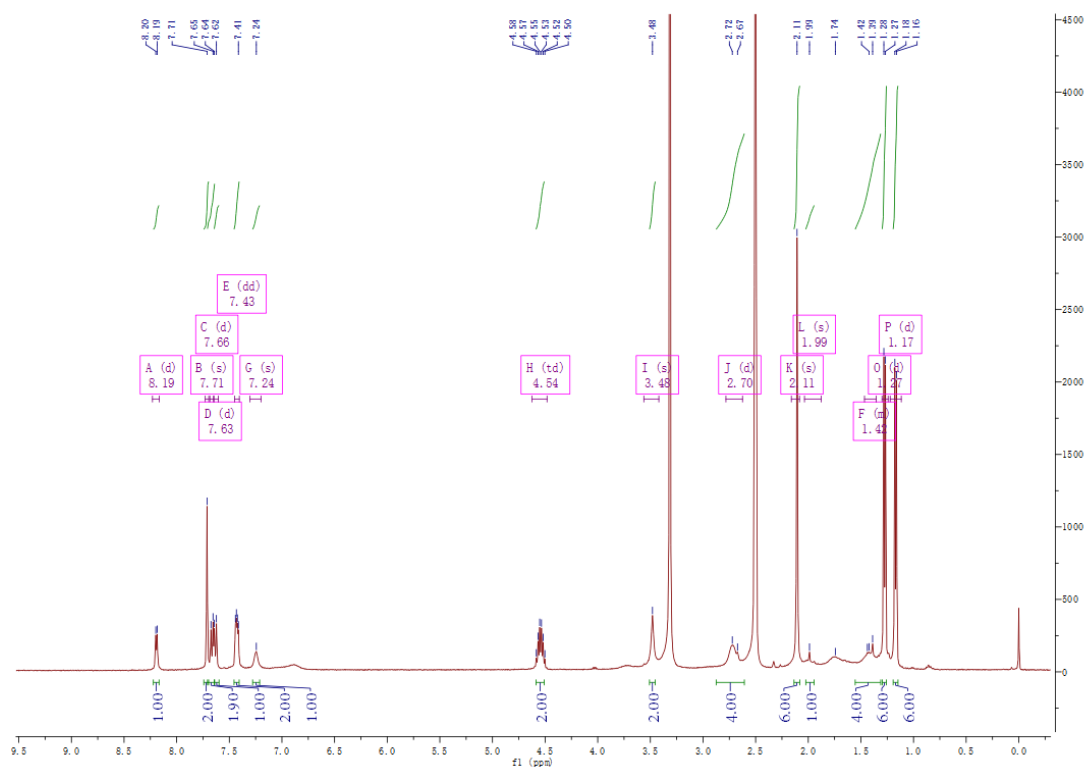

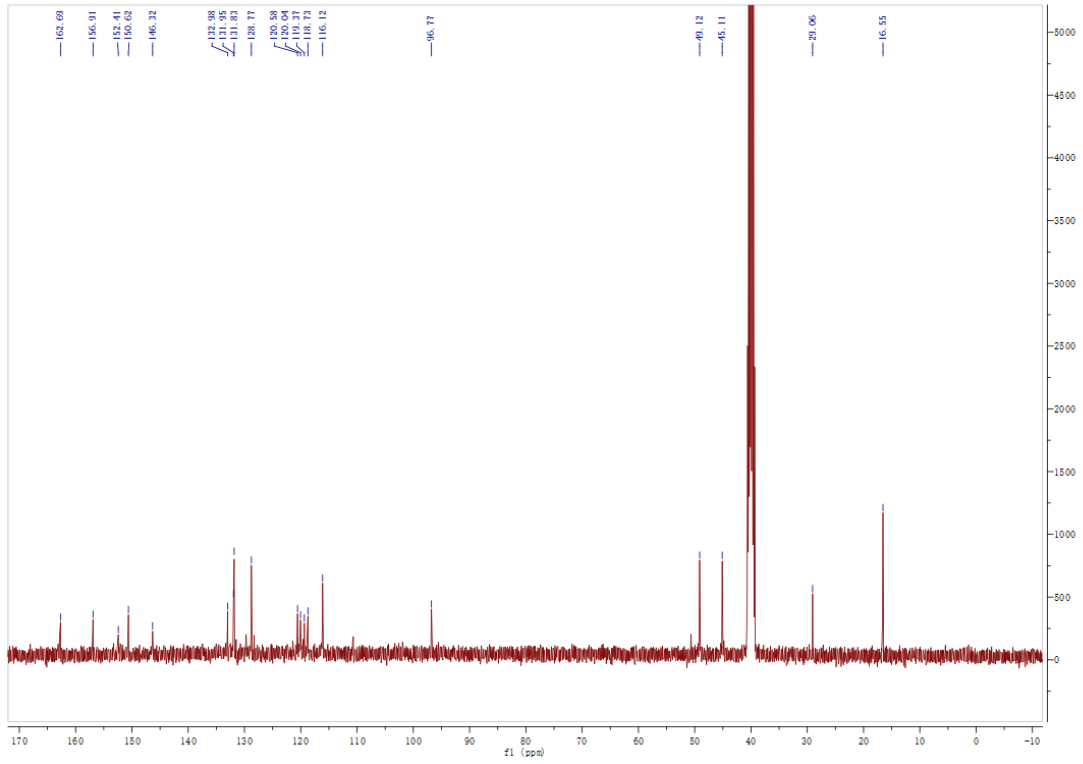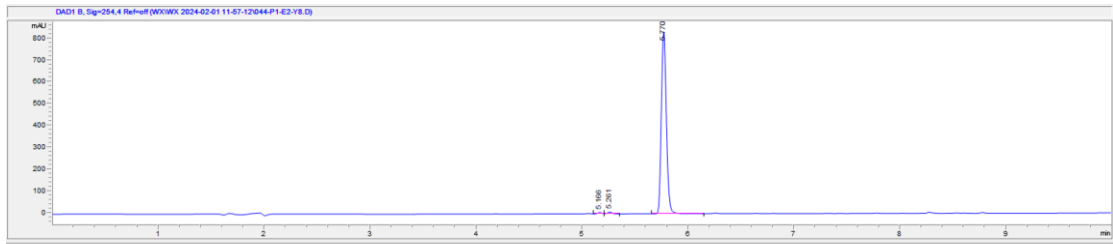

| # | 时间    | 峰面积    | 峰高    | 峰宽     | 峰面积 %  | 对称因子  | 类型 |
|---|-------|--------|-------|--------|--------|-------|----|
| 1 | 5.166 | 17.9   | 5.9   | 0.0472 | 0.641  | 0.931 | VV |
| 2 | 5.261 | 25.7   | 7.9   | 0.05   | 0.921  | 0.966 | VB |
| 3 | 5.77  | 2743.3 | 836.5 | 0.0523 | 98.438 | 0.832 | BB |

**di-tert-butyl (4-((4-((4-(4-cyano-2,6-dimethylphenoxy)thieno[3,2-d]pyrimidin-2-yl)amino)piperidin-1-yl)methyl)phenyl)phosphonate (9g)**

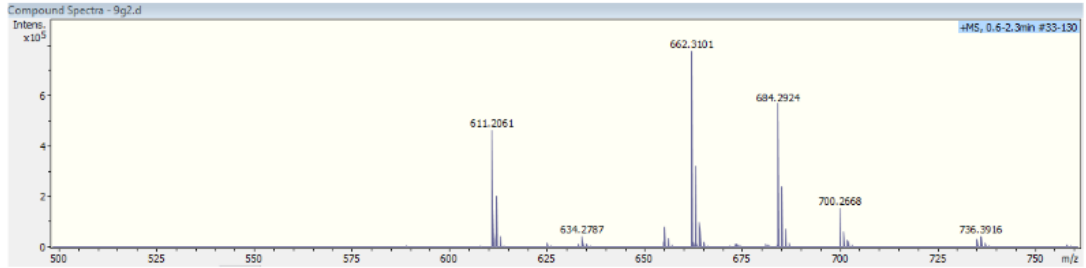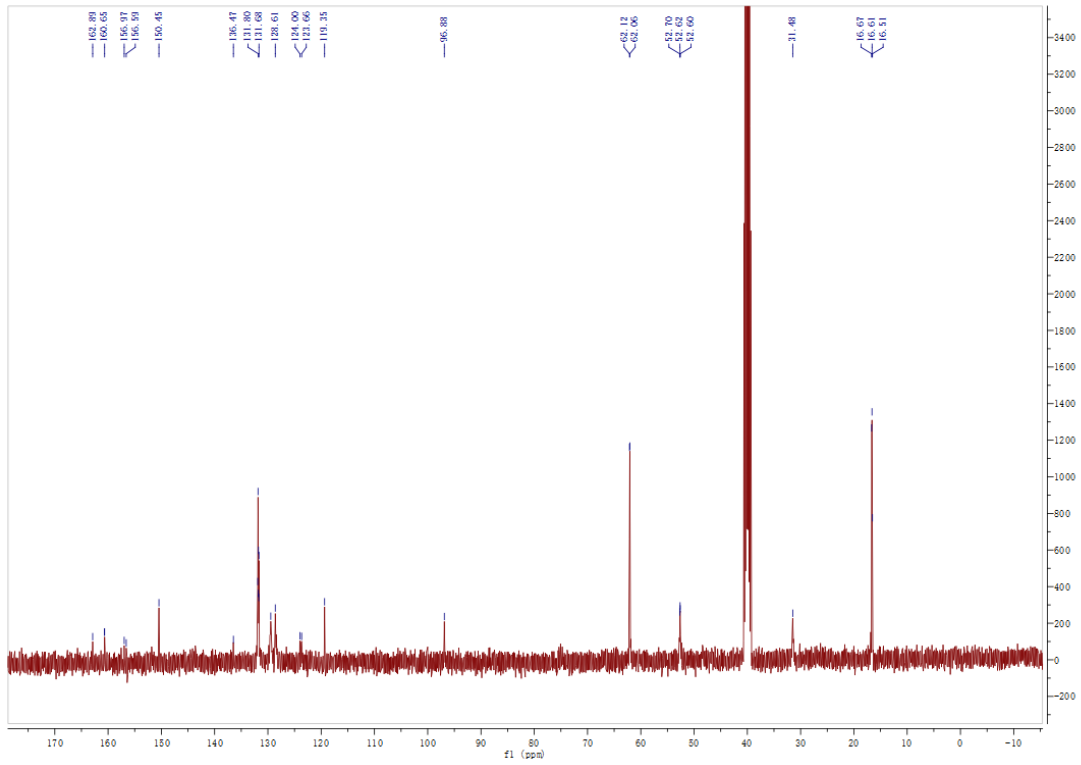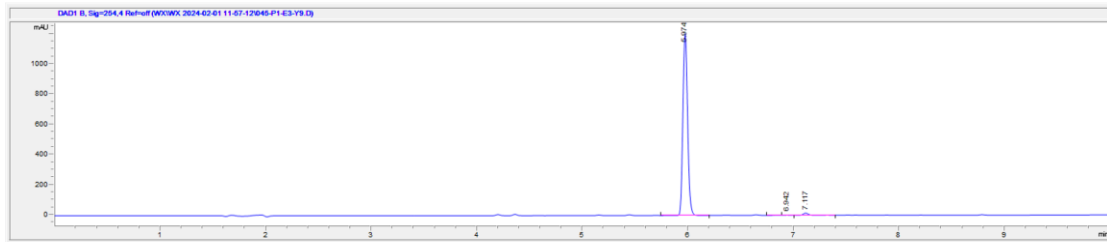

| # | 时间    | 峰面积    | 峰高     | 峰宽     | 峰面积%   | 对称因子  | 类型   |
|---|-------|--------|--------|--------|--------|-------|------|
| 1 | 5.974 | 3754.6 | 1210.8 | 0.0501 | 98.178 | 0.881 | BB R |
| 2 | 6.942 | 5.5    | 1.5    | 0.0562 | 0.144  | 0.946 | VVE  |
| 3 | 7.117 | 64.2   | 14.6   | 0.0631 | 1.678  | 1.344 | BB R |



*diisobutyl (4-((4-((4-(4-cyano-2,6-dimethylphenoxy)thieno[3,2-d]pyrimidin-2-yl)amino)piperidin-1-yl)methyl)phenyl)phosphonate (9h)*

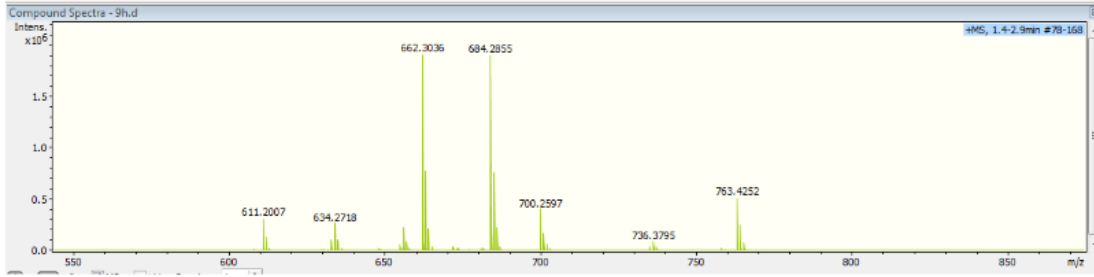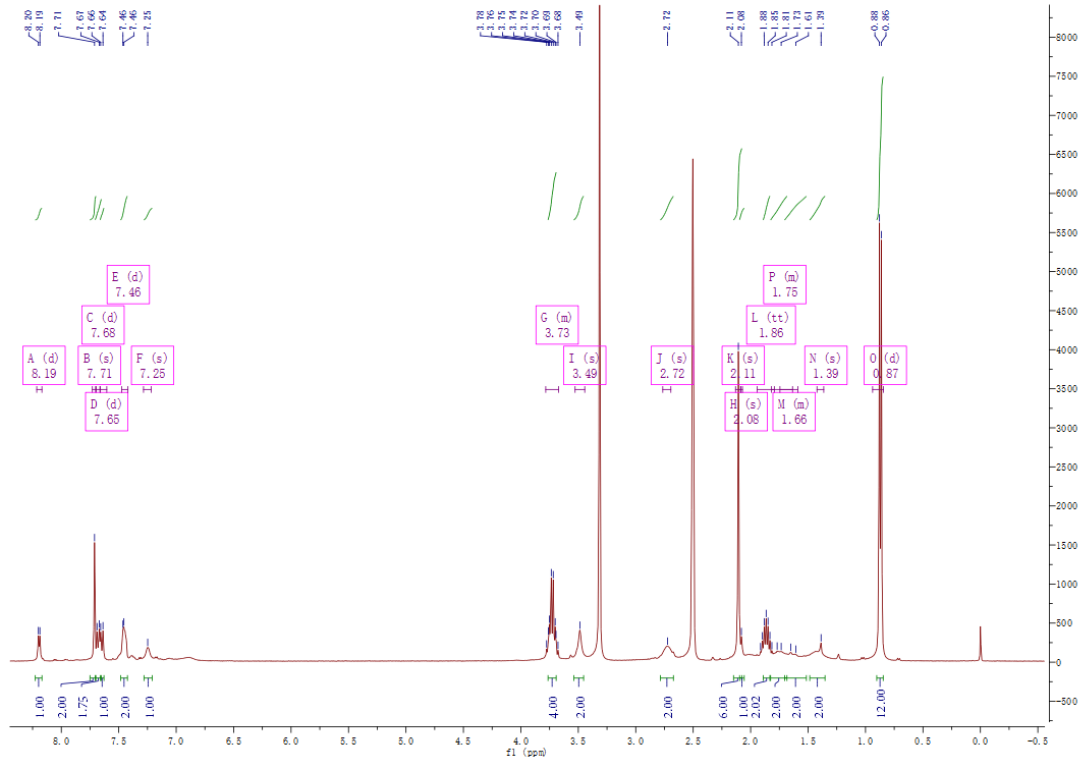

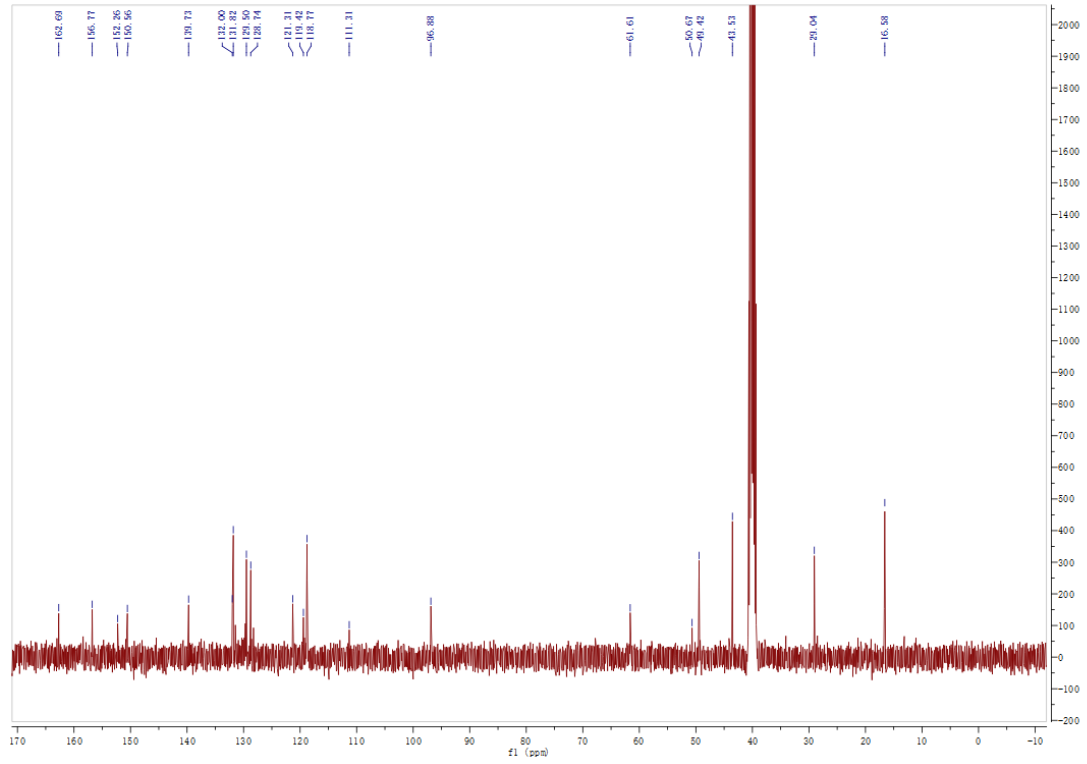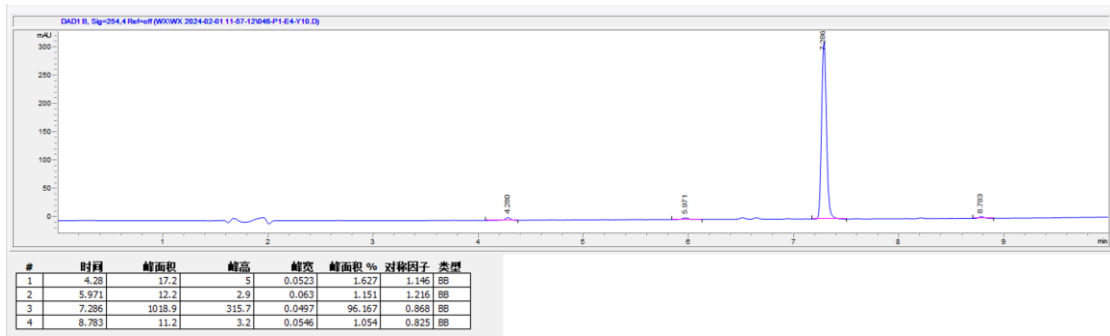

***(4-((4-((4-(4-cyano-2,6-dimethylphenoxy)thieno[3,2-d]pyrimidin-2-yl)amino)piperidin-1-yl)methyl)phenyl)phosphonic acid (10)***

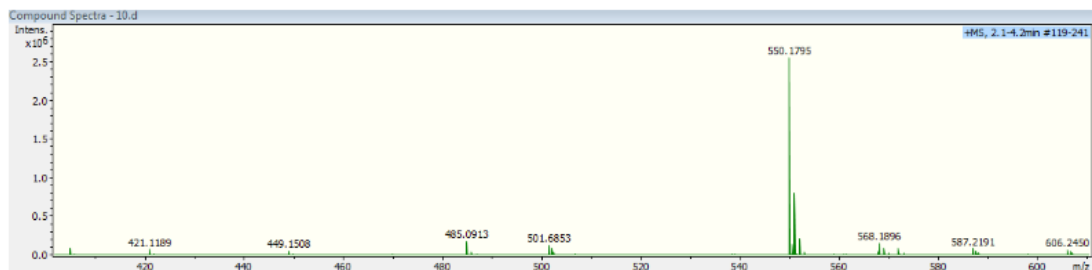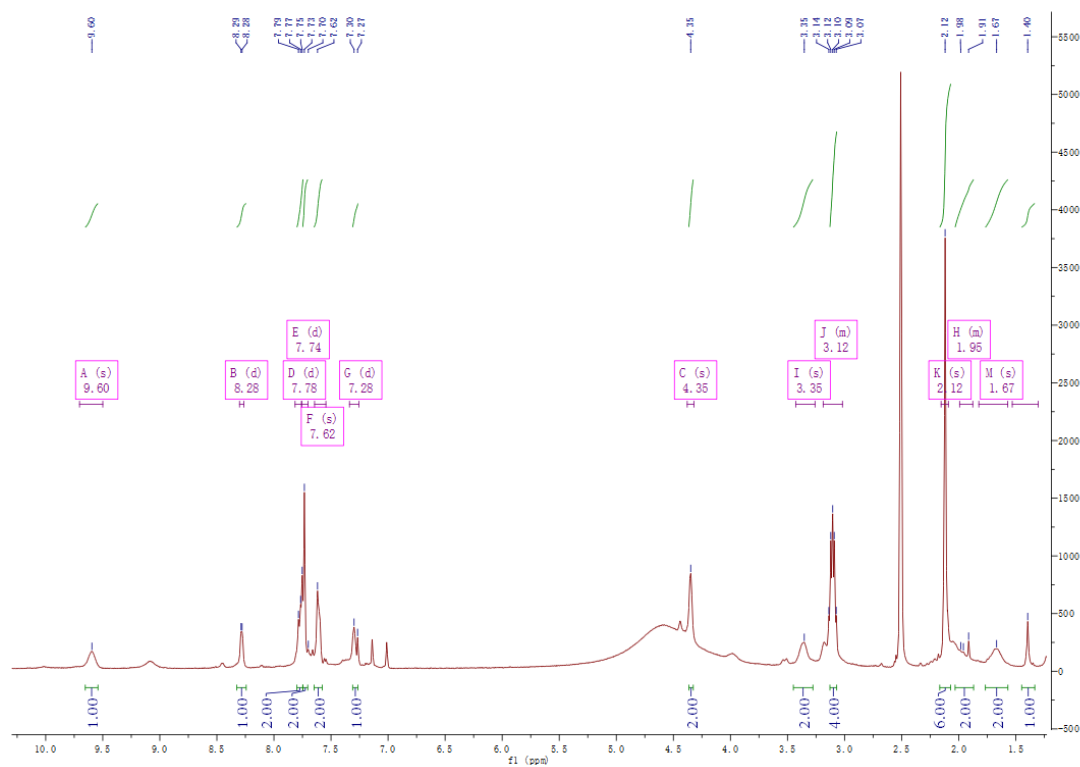

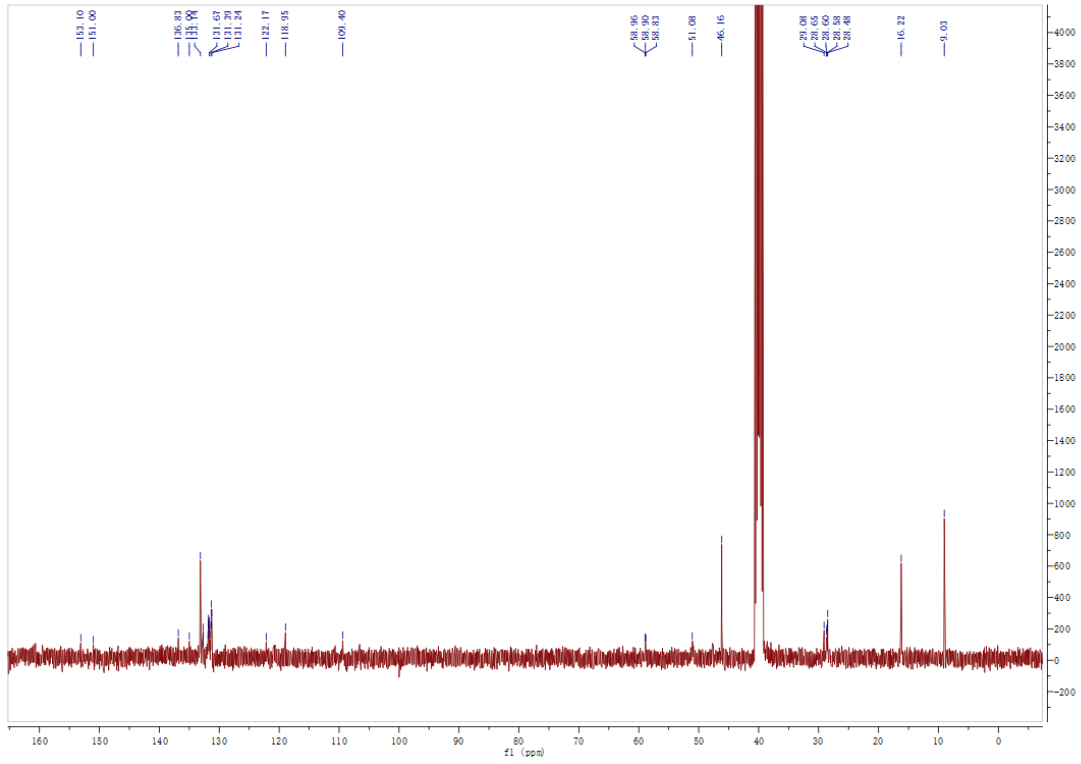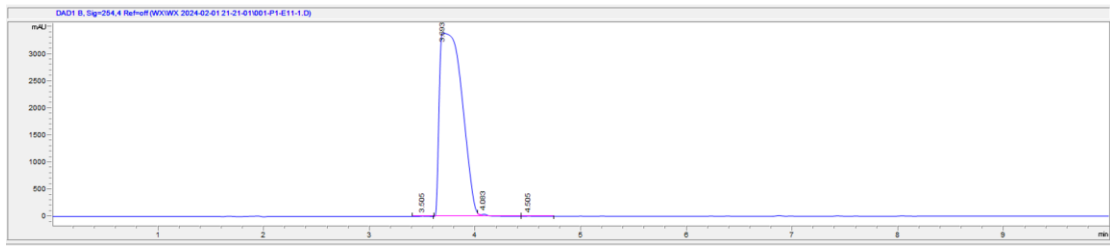

| # | 时间    | 峰面积     | 峰高     | 峰宽     | 峰面积 %  | 对称因子  | 类型   |
|---|-------|---------|--------|--------|--------|-------|------|
| 1 | 3.505 | 18.9    | 5      | 0.0564 | 0.037  | 0.558 | BB   |
| 2 | 3.692 | 50412.9 | 3395.9 | 0.2432 | 99.564 | 0.198 | BB R |
| 3 | 4.083 | 181.9   | 35.9   | 0.0711 | 0.359  | 0.399 | VV E |
| 4 | 4.505 | 20      | 3.8    | 0.0731 | 0.039  | 0.718 | VV E |

**(E)-3-(4-((2-((1-(4-(dimethylphosphoryl)benzyl)piperidin-4-yl)amino)thieno[3,2-d]pyrimidin-4-yl)oxy)-3,5-dimethylphenyl)acrylonitrile (15a)**

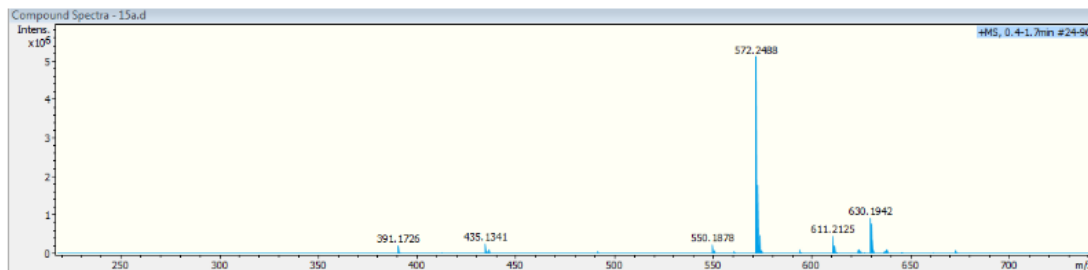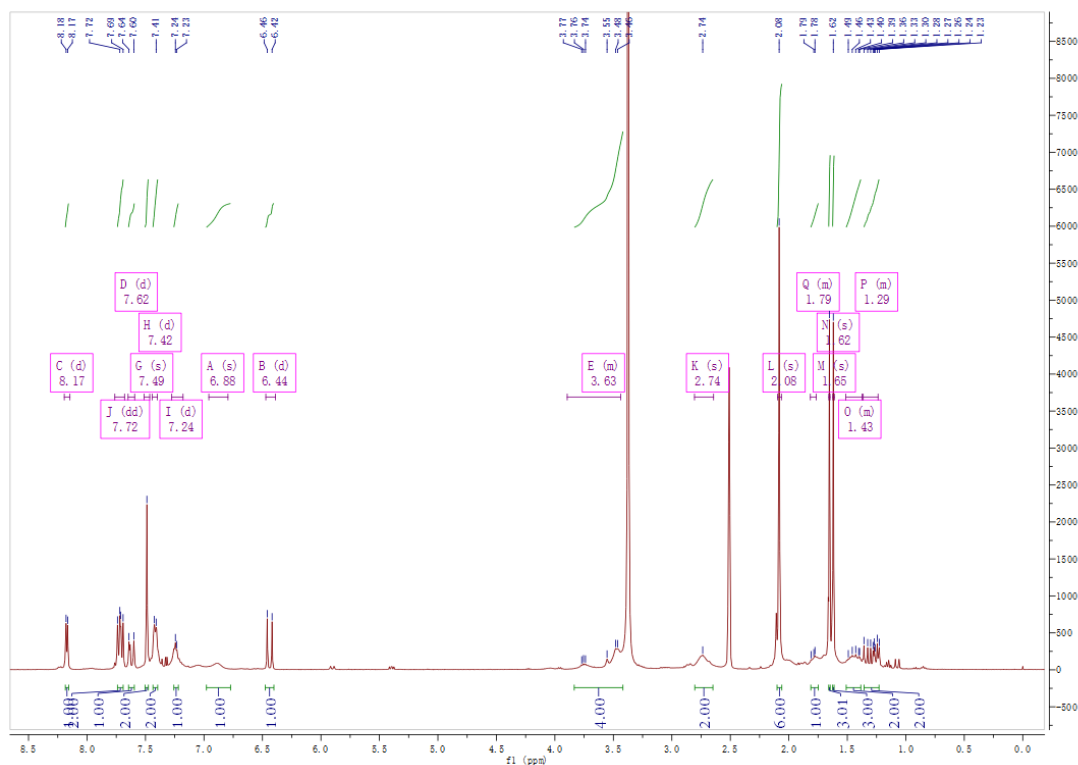

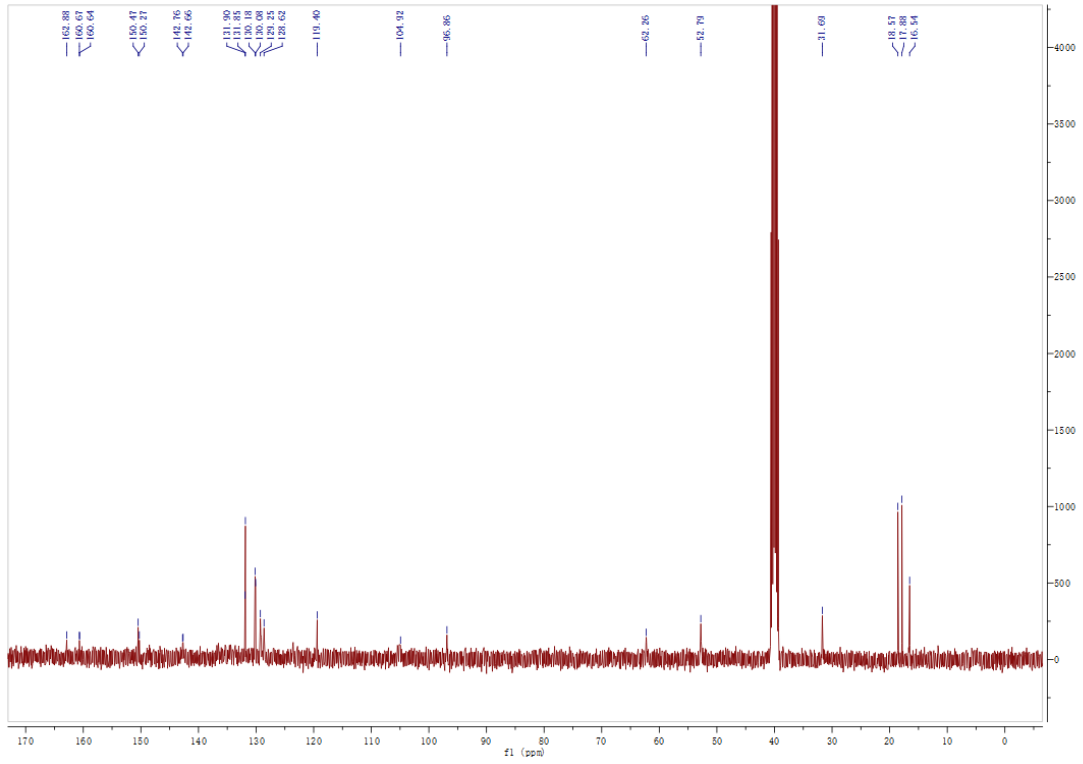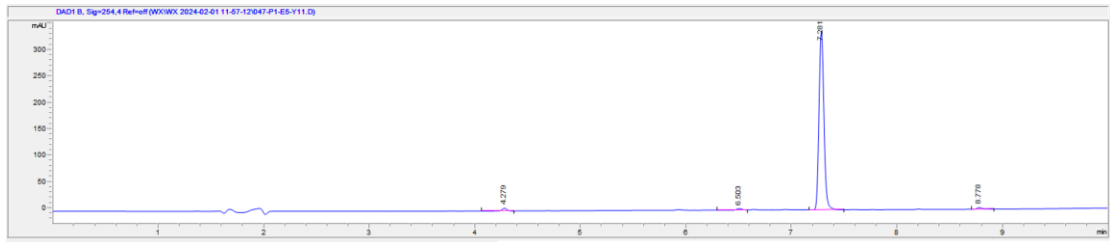

| # | 时间    | 峰面积    | 峰高  | 峰宽     | 峰面积%   | 对称因子  | 类型 |
|---|-------|--------|-----|--------|--------|-------|----|
| 1 | 4.279 | 38.1   | 8.3 | 0.052  | 1.504  | 1.119 | BB |
| 2 | 6.503 | 10.5   | 2.8 | 0.0575 | 0.930  | 0.86  | BV |
| 3 | 7.281 | 1092.3 | 339 | 0.0516 | 96.533 | 0.855 | BB |
| 4 | 8.778 | 10.6   | 3   | 0.0536 | 0.933  | 0.787 | BB |





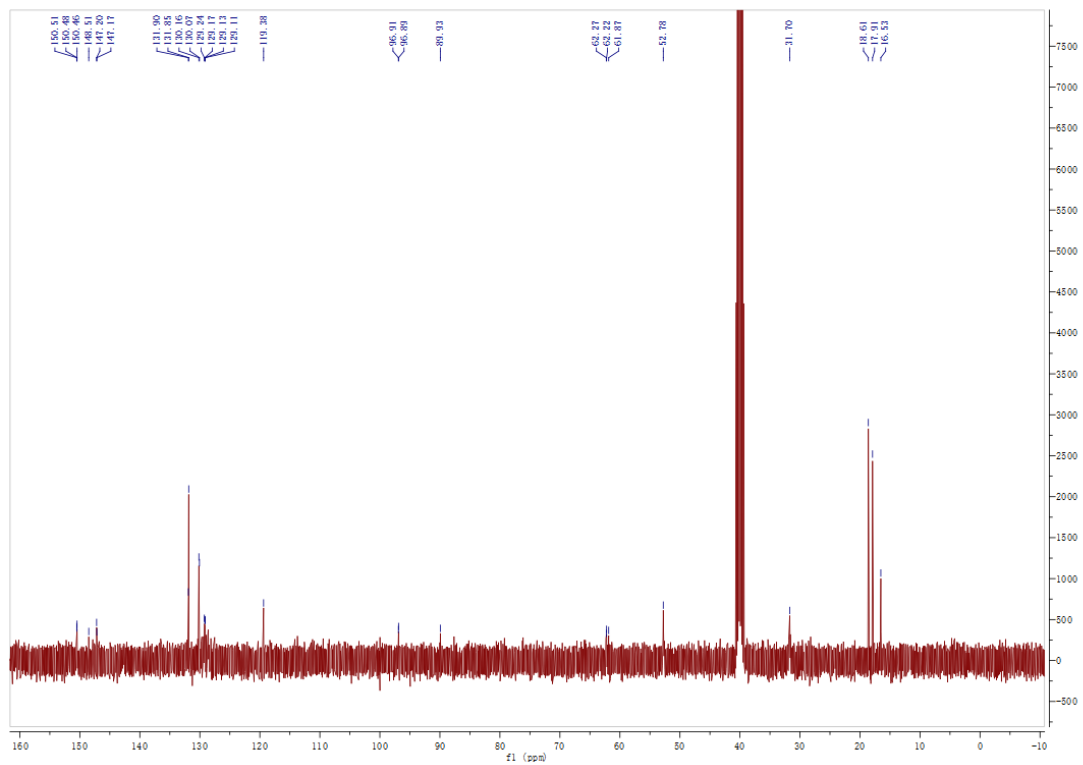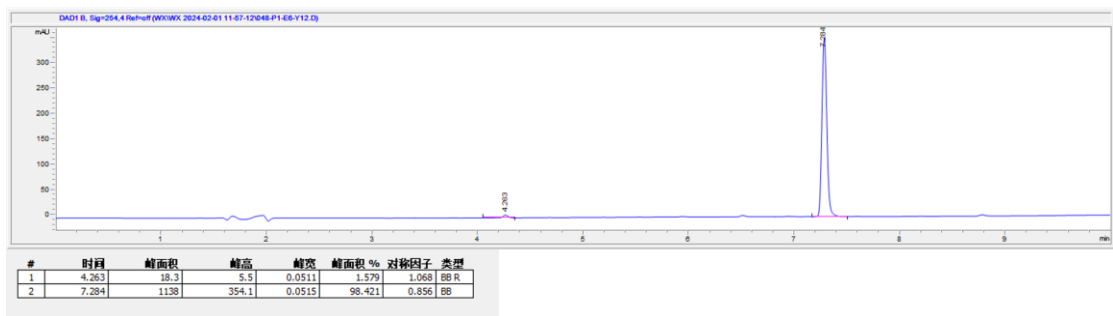

diethyl (E)-4-((4-((4-(4-(2-cyanovinyl)-2,6-dimethylphenoxy)thieno[3,2-d]pyrimidin-2-yl)amino)piperidin-1-yl)methyl)phenyl)phosphonate (15c)

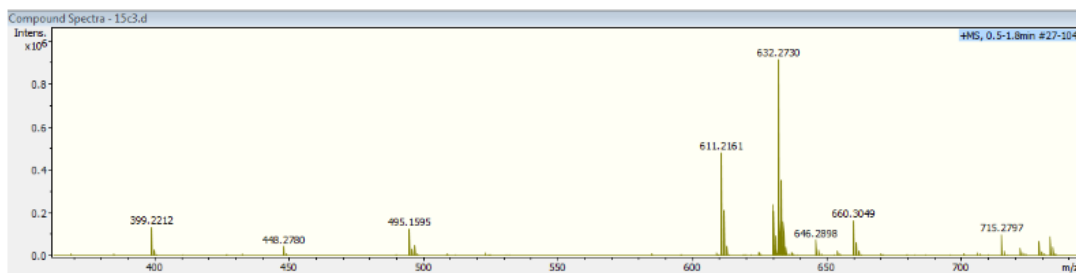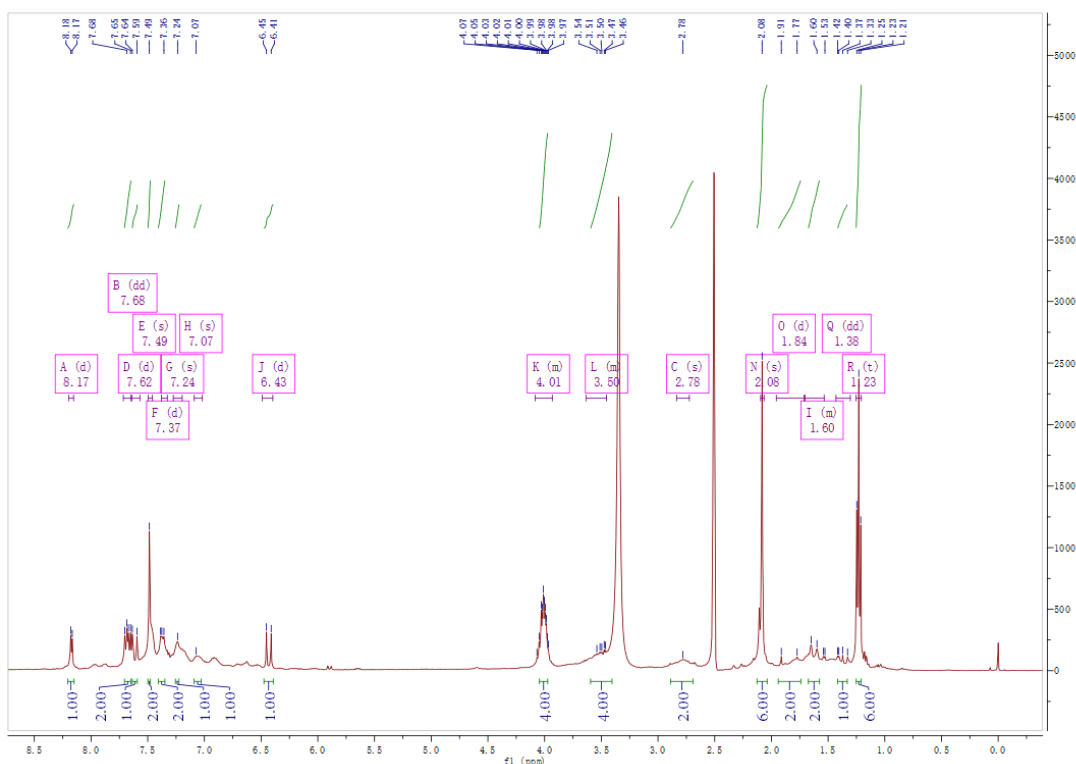

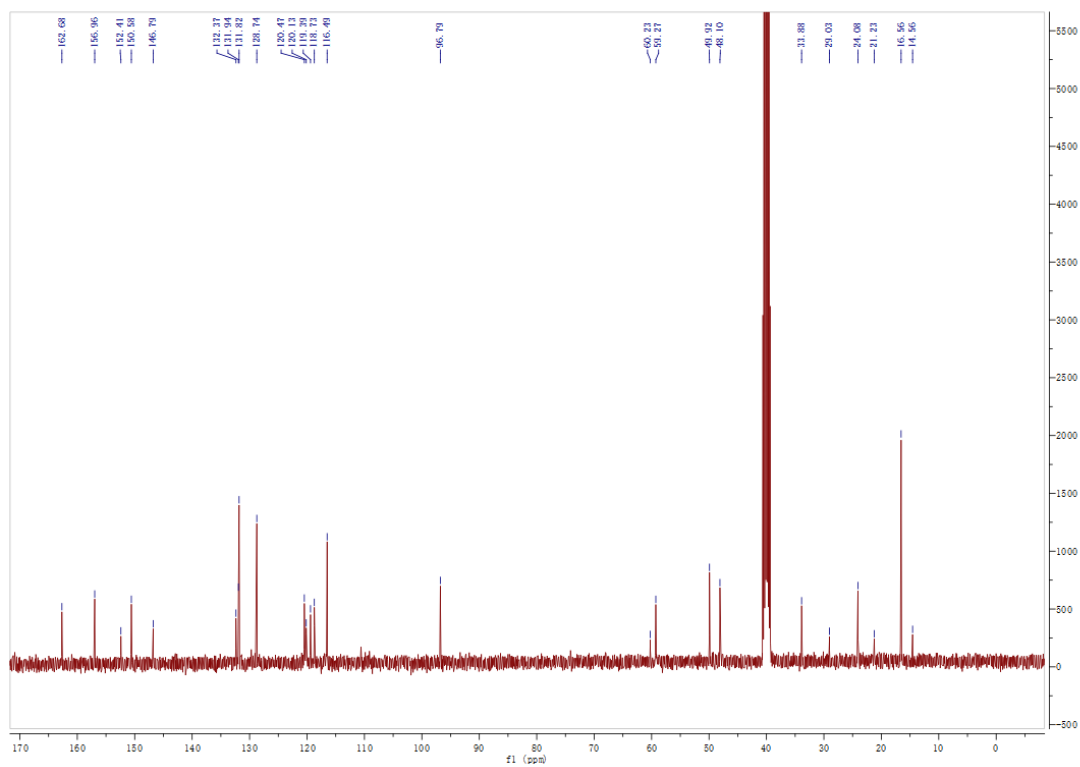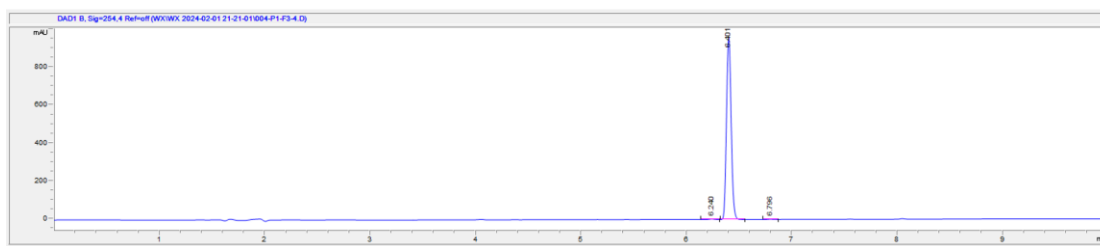

| # | 时间    | 峰面积    | 峰高    | 峰宽     | 峰面积%   | 对称因子  | 类型 |
|---|-------|--------|-------|--------|--------|-------|----|
| 1 | 6.24  | 10.4   | 3     | 0.0531 | 0.350  | 1.077 | BB |
| 2 | 6.401 | 2958.3 | 959.3 | 0.048  | 99.470 | 0.894 | BB |
| 3 | 6.796 | 5.3    | 1.6   | 0.0518 | 0.179  | 0.859 | BB |

dibutyl

(E)-4-((4-((4-(4-(2-cyanovinyl)-2,6-dimethylphenoxy)thieno[3,2-d]pyrimidin-2-yl)amino)piperidin-1-yl)methyl)phenyl)phosphonate (15d)

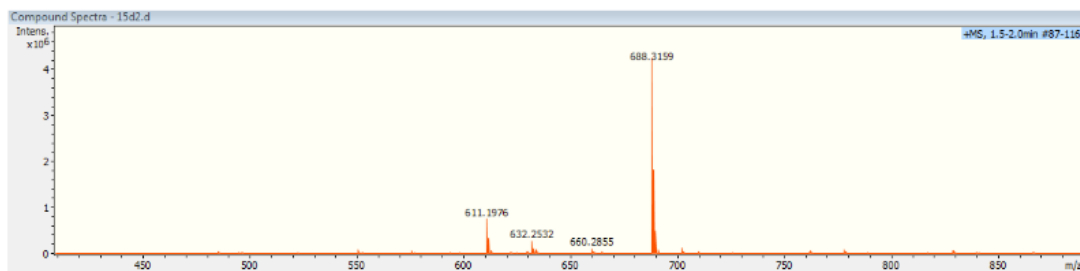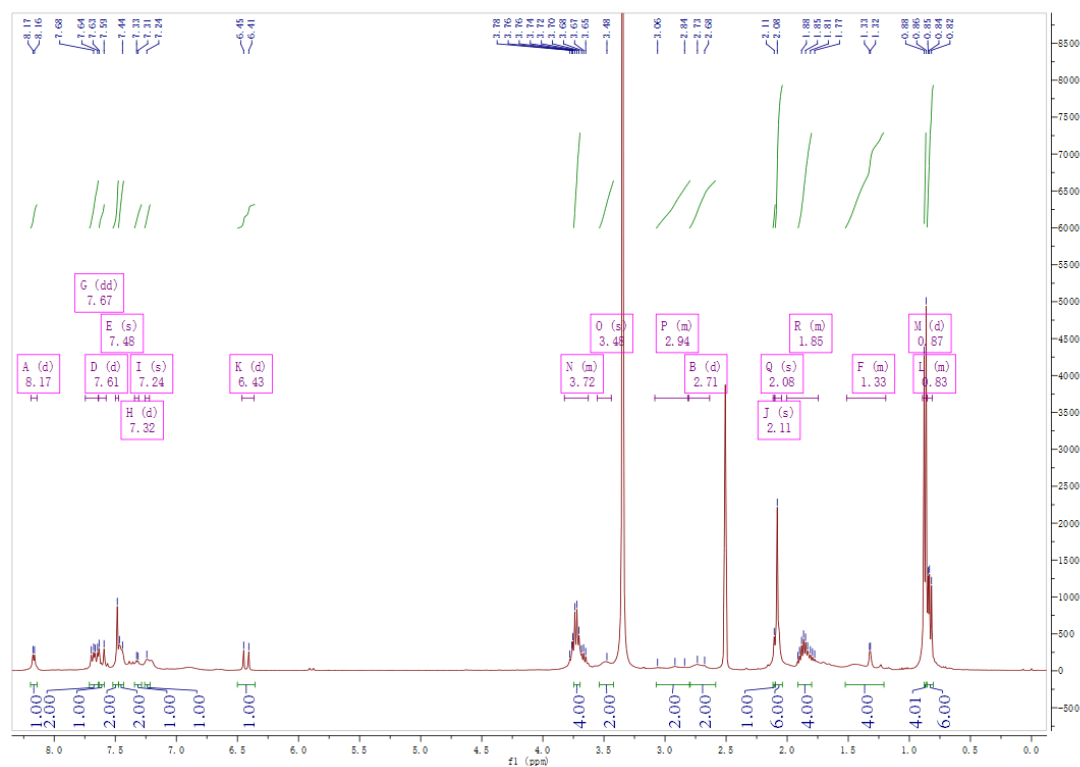

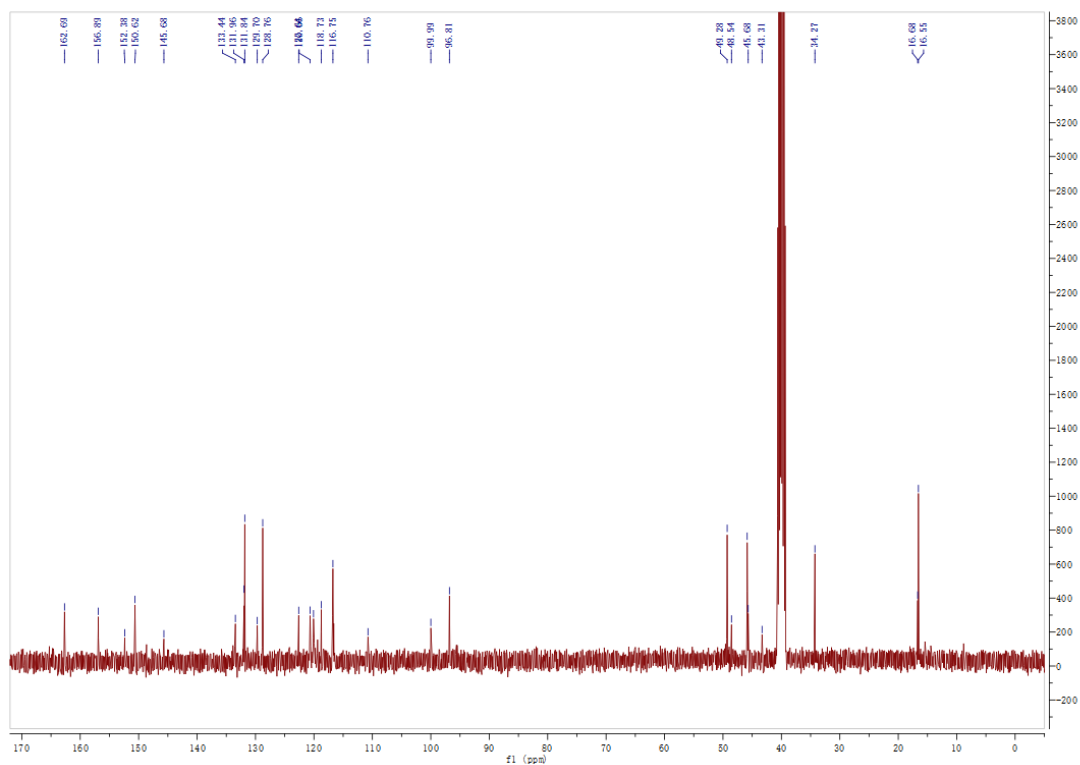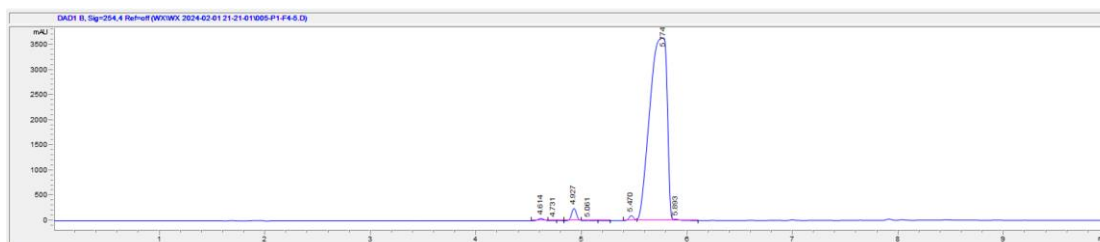

| # | 时间    | 峰面积     | 峰高     | 峰宽     | 峰面积%   | 对称因子  | 类型   |
|---|-------|---------|--------|--------|--------|-------|------|
| 1 | 4.614 | 169.9   | 44.4   | 0.0606 | 0.398  | 0.882 | BB R |
| 2 | 4.731 | 5.3     | 1.9    | 0.0427 | 0.012  | 0.868 | VV E |
| 3 | 4.927 | 792.1   | 244.9  | 0.0497 | 1.856  | 0.91  | BB R |
| 4 | 5.061 | 18.3    | 4      | 0.0656 | 0.043  | 0.528 | VV E |
| 5 | 5.47  | 305.8   | 99.7   | 0.0498 | 0.716  | 0.983 | BV E |
| 6 | 5.774 | 41301.3 | 3646.3 | 0.1861 | 96.745 | 3.359 | BB R |
| 7 | 5.893 | 98.3    | 24.5   | 0.0568 | 0.230  | 0.434 | VB E |

bis(2,2,2-trifluoroethyl)

(E)-4-((4-((4-(4-(2-cyanovinyl)-2,6-

dimethylphenoxy)thieno[3,2-d]pyrimidin-2-yl)amino)piperidin-1-

yl)methyl)phenyl)phosphonate (15e)

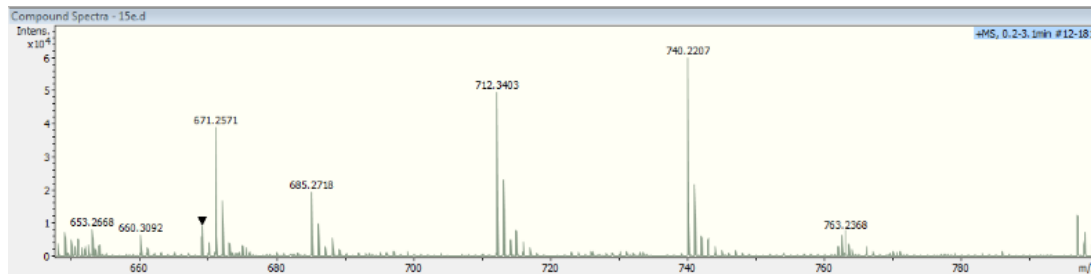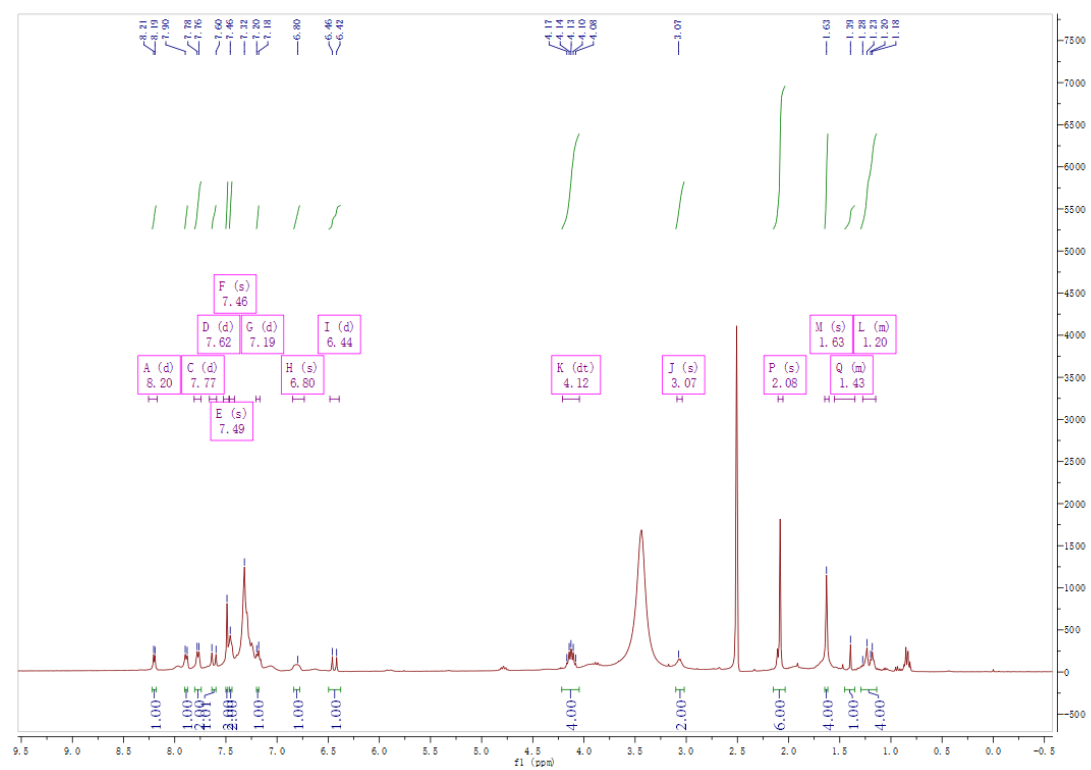

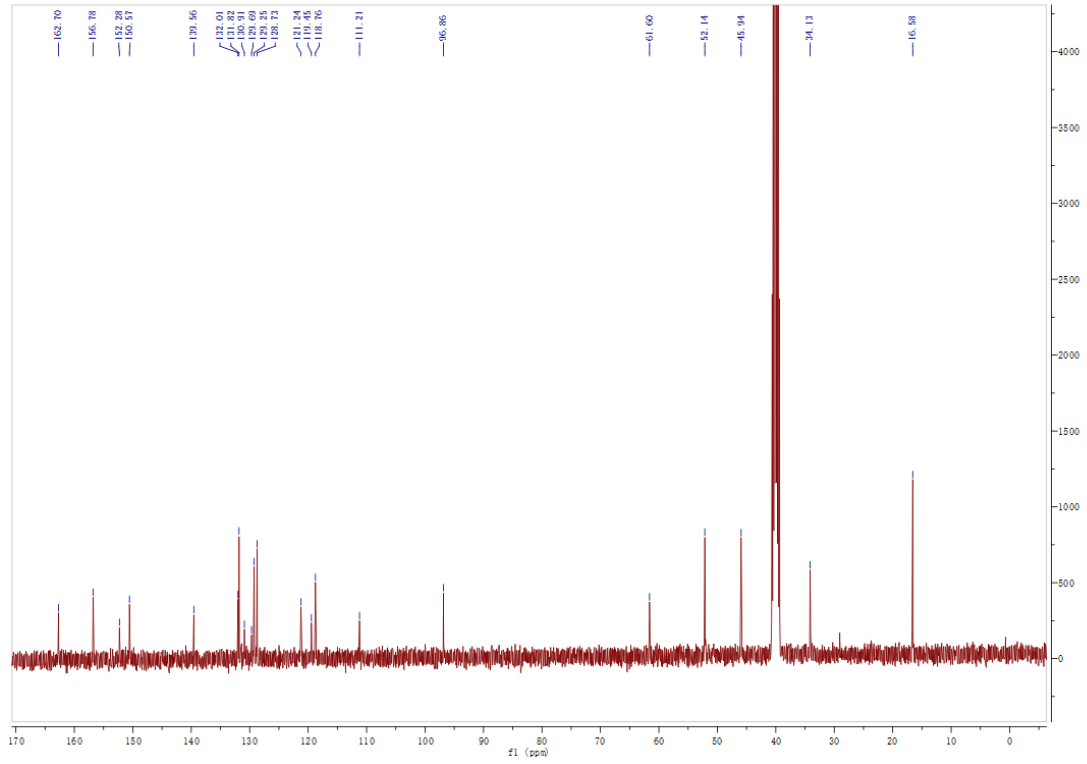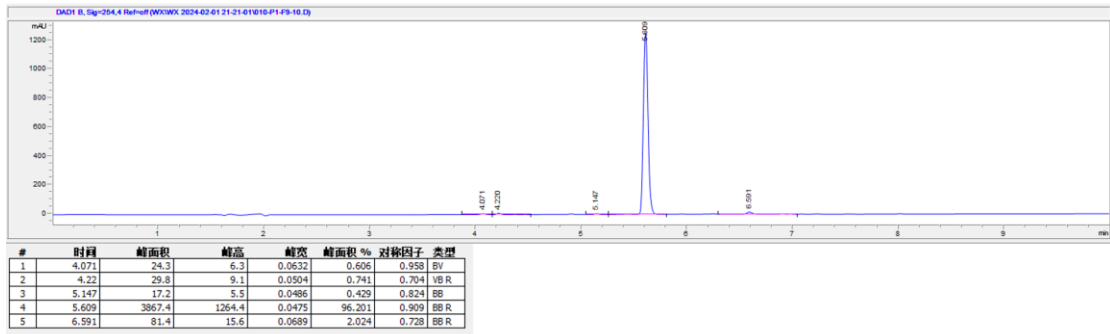

*diisopropyl*      *(E)*-*(4-((4-((4-(4-(2-cyanovinyl)-2,6-dimethylphenoxy)thieno[3,2-d]pyrimidin-2-yl)amino)piperidin-1-yl)methyl)phenyl)phosphonate (15f)*

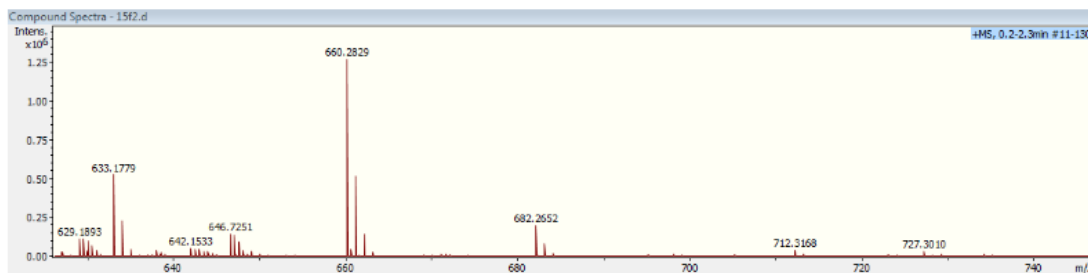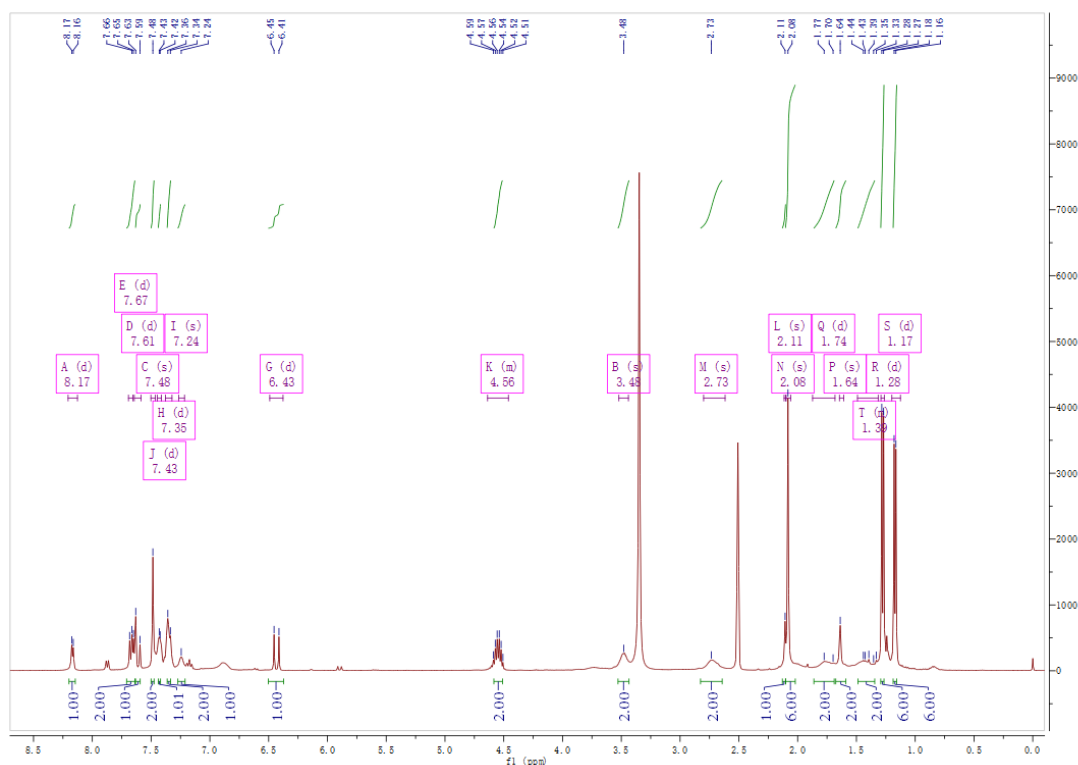



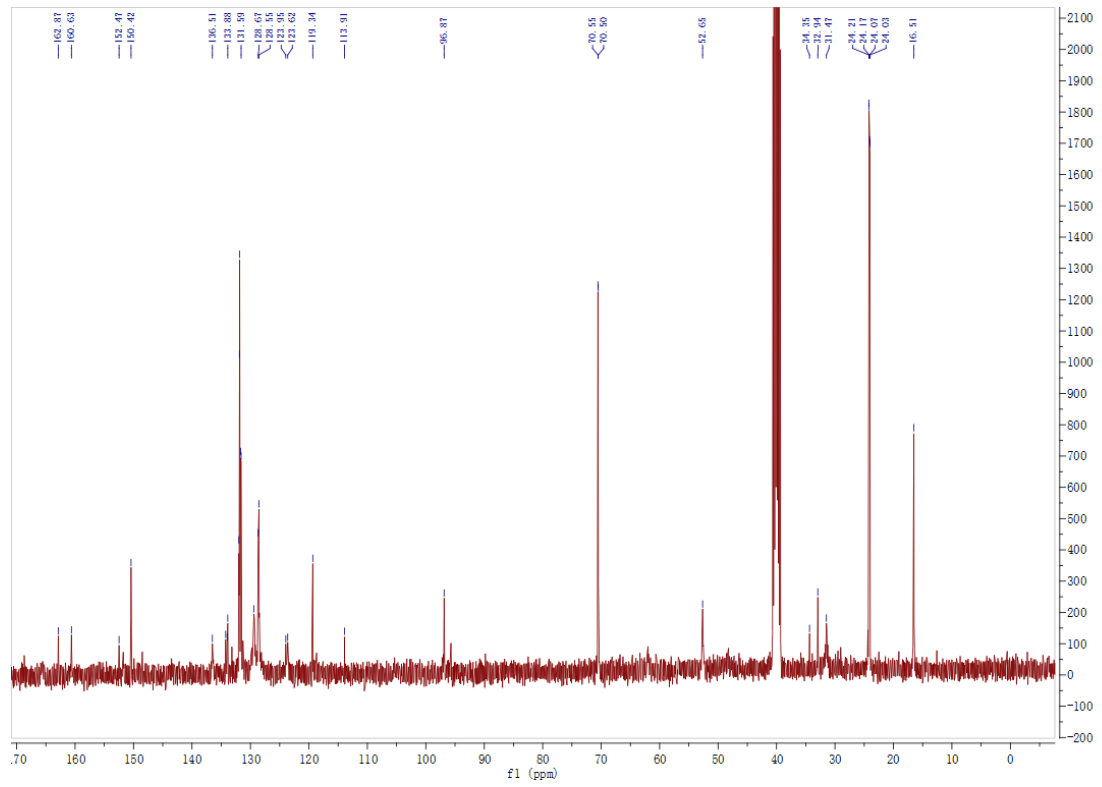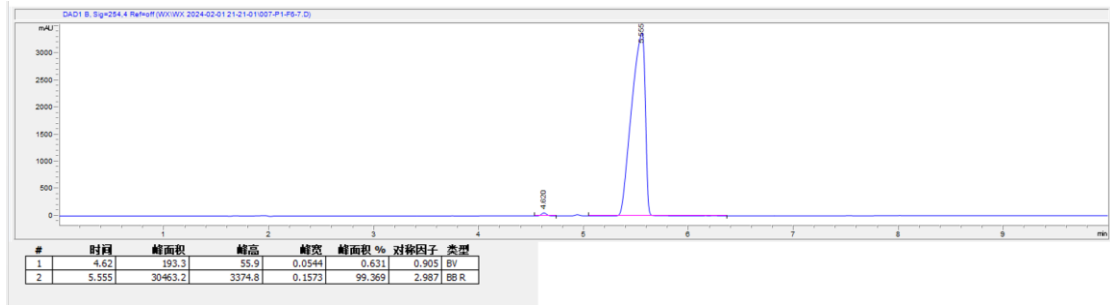

*di-tert-butyl (E)-4-((4-((4-(4-(2-cyanovinyl)-2,6-dimethylphenoxy)thieno[3,2-d]pyrimidin-2-yl)amino)piperidin-1-yl)methyl)phenyl)phosphonate (15g)*

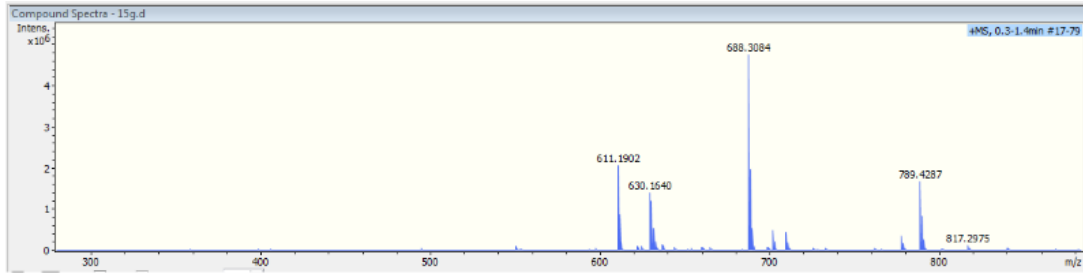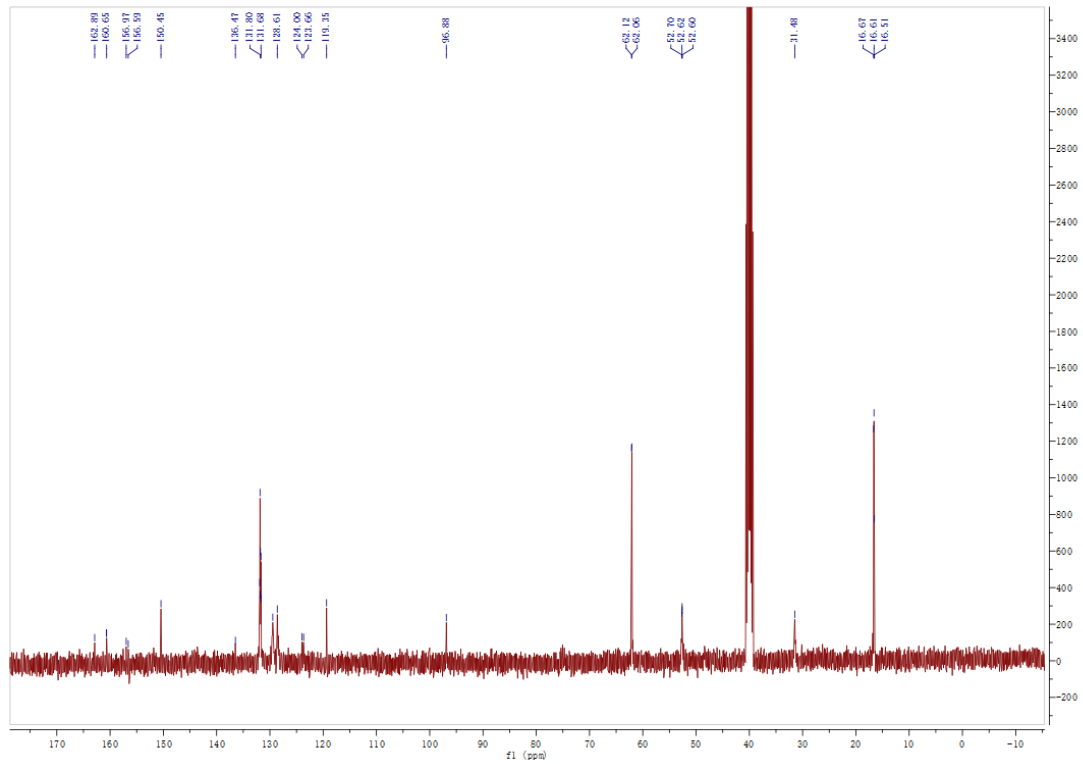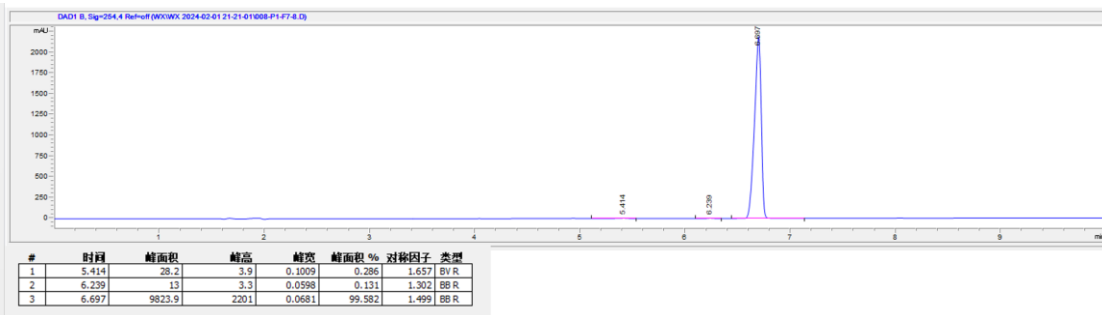

*diisobutyl* (E)-4-((4-((4-(4-(2-cyanovinyl)-2,6-dimethylphenoxy)thieno[3,2-d]pyrimidin-2-yl)amino)piperidin-1-yl)methyl)phenyl)phosphonate (*15h*)

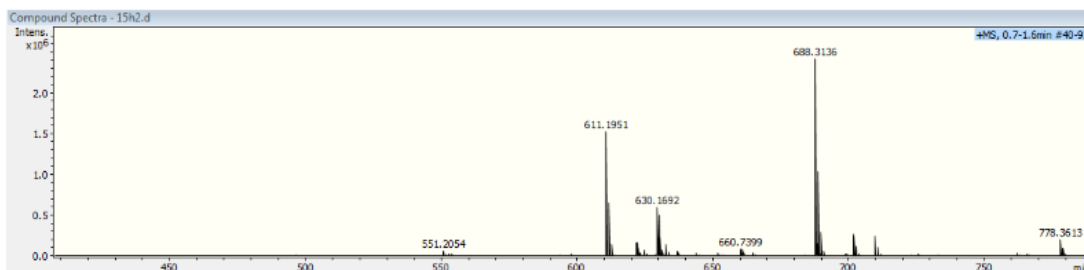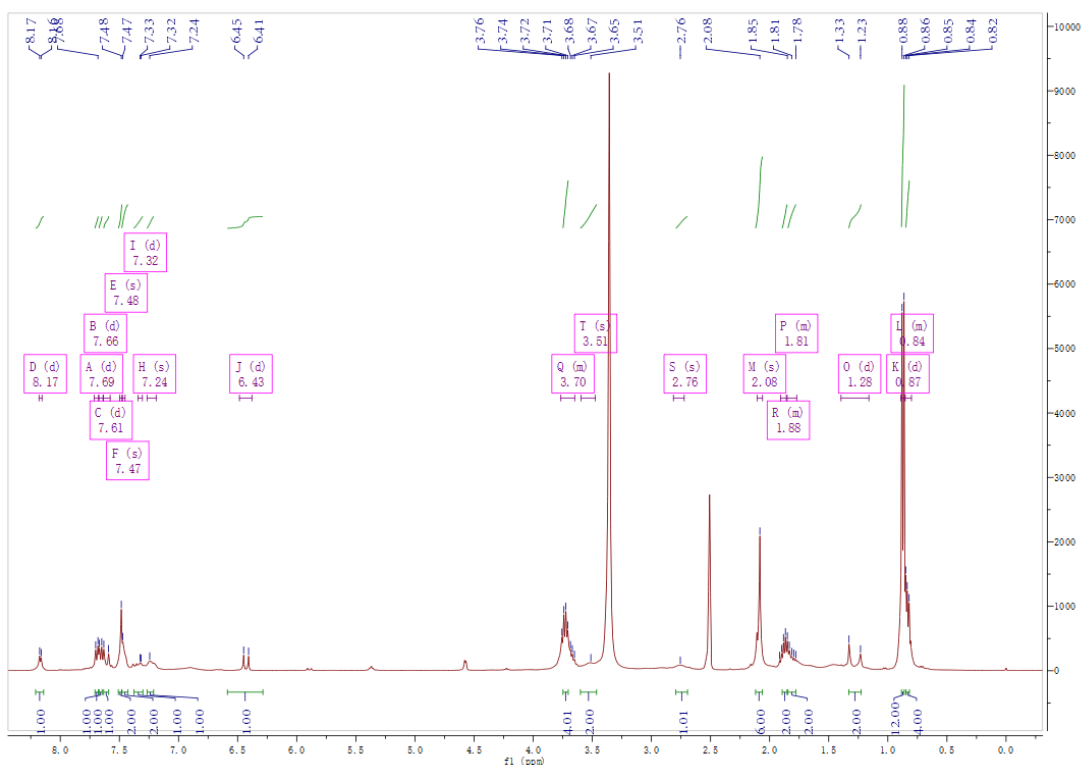

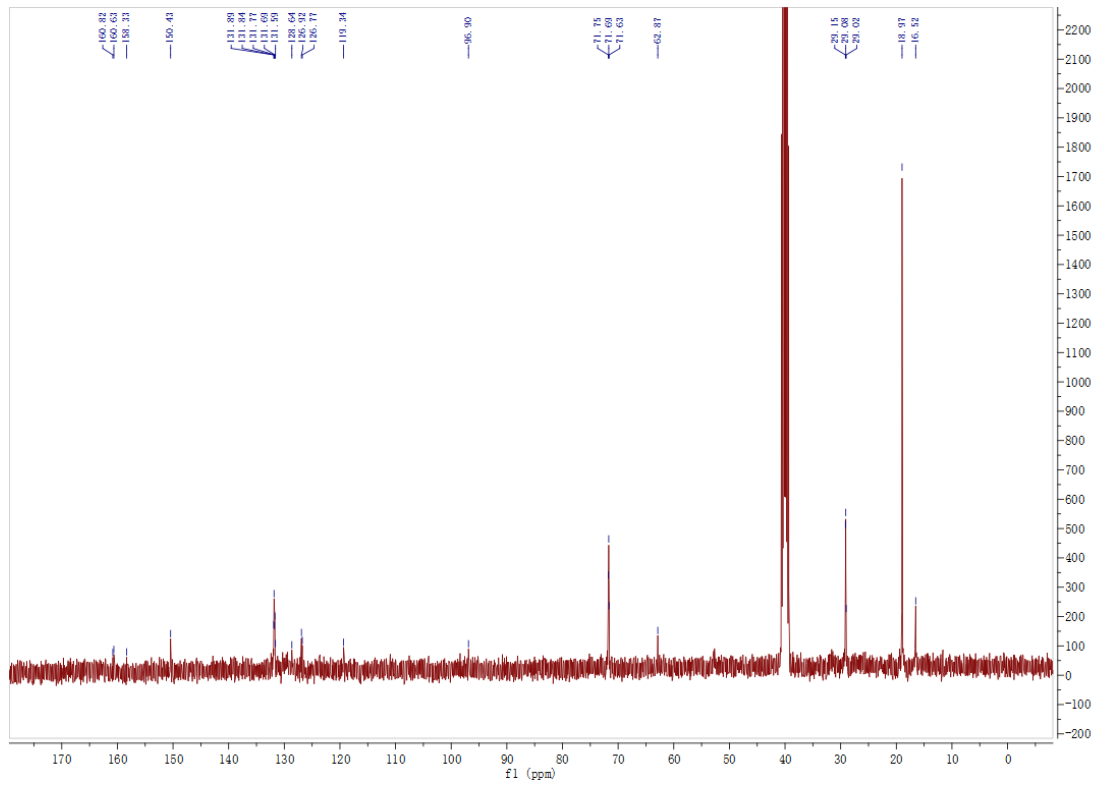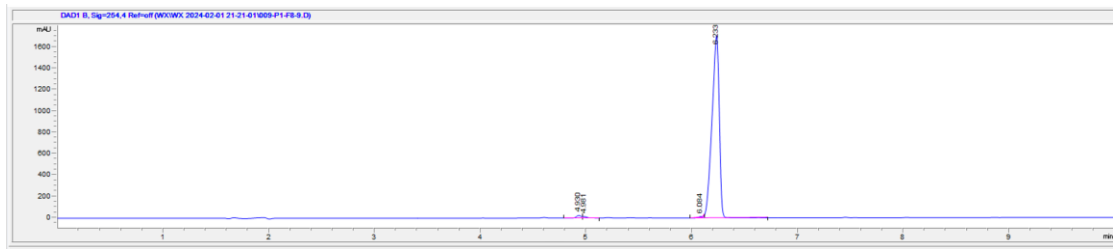

| # | 时间    | 峰面积    | 峰高     | 峰宽     | 峰面积 %  | 对称因子  | 类型   |
|---|-------|--------|--------|--------|--------|-------|------|
| 1 | 4.93  | 83     | 24.9   | 0.0489 | 0.589  | 0.88  | BV   |
| 2 | 4.981 | 39.3   | 13.4   | 0.049  | 0.469  | 0.266 | VV   |
| 3 | 6.084 | 32     | 11.9   | 0.0395 | 0.382  | 1.641 | BV E |
| 4 | 6.233 | 8230.8 | 1718.4 | 0.0718 | 98.160 | 1.646 | BB R |

***(E)*-4-(((4-((4-(4-(2-cyanovinyl)-2,6-dimethylphenoxy)thieno[3,2-d]pyrimidin-2-yl)amino)piperidin-1-yl)methyl)phenyl)phosphonic acid (16)**

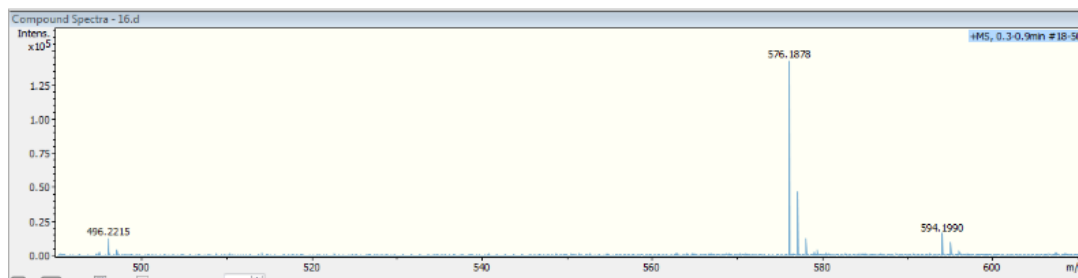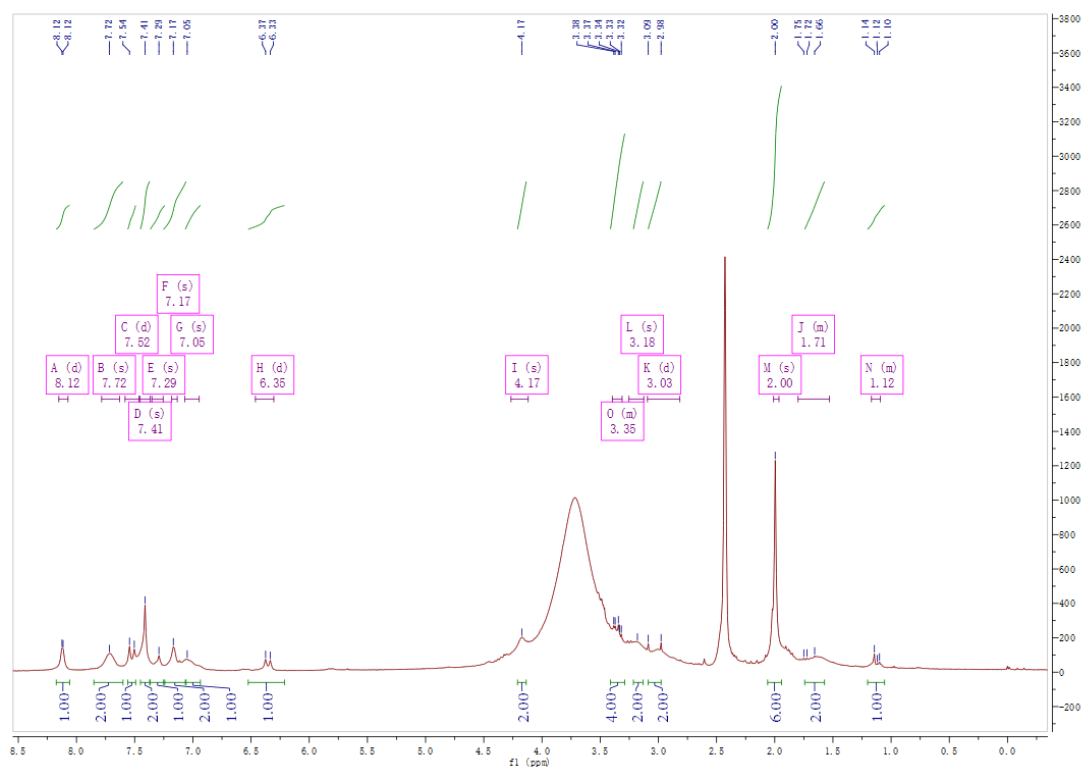

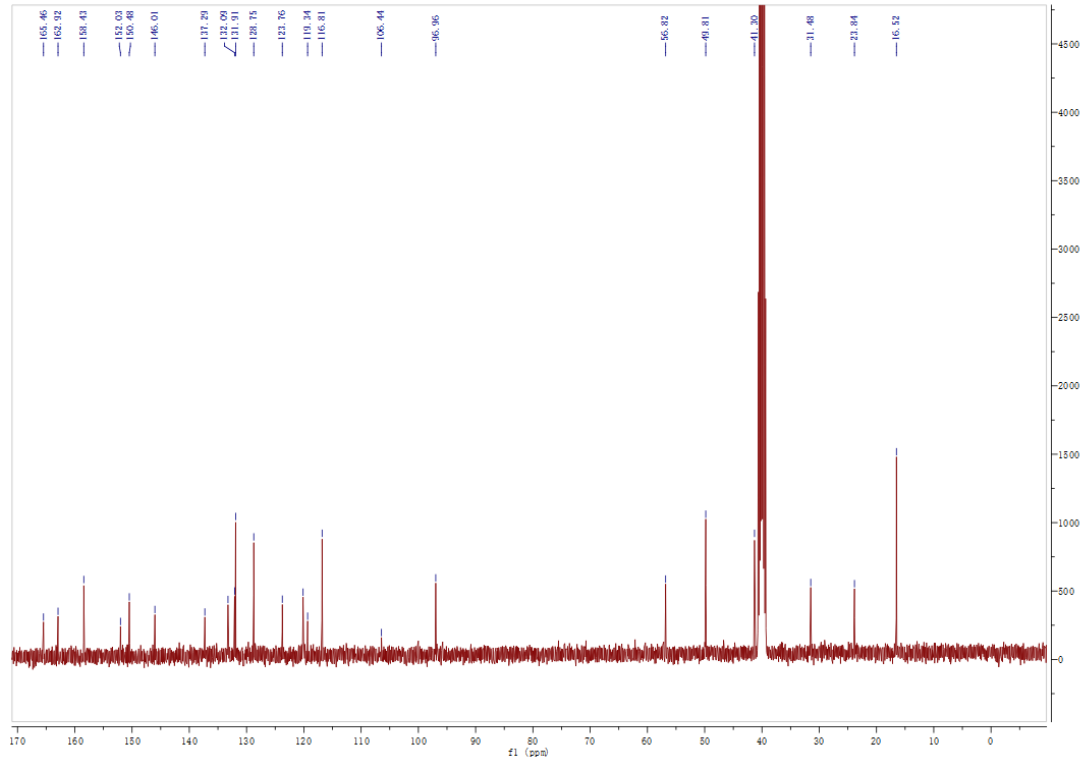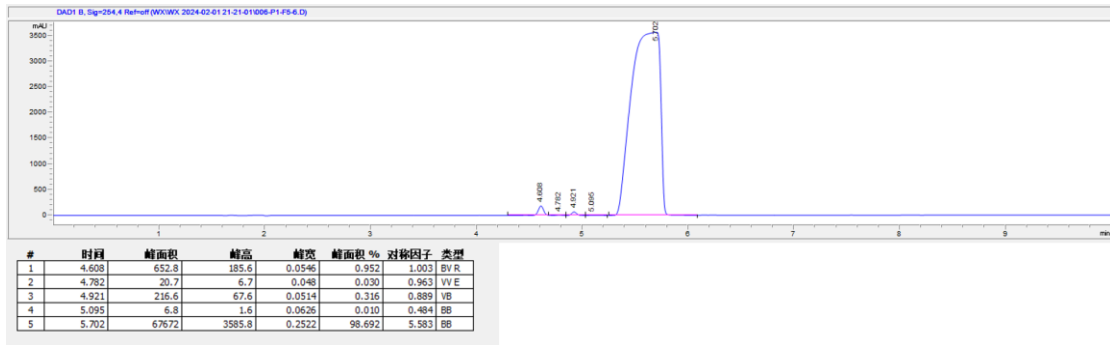

## 15a·HCl

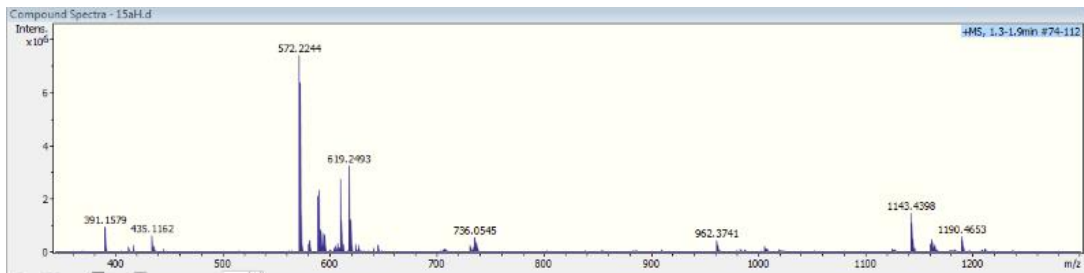

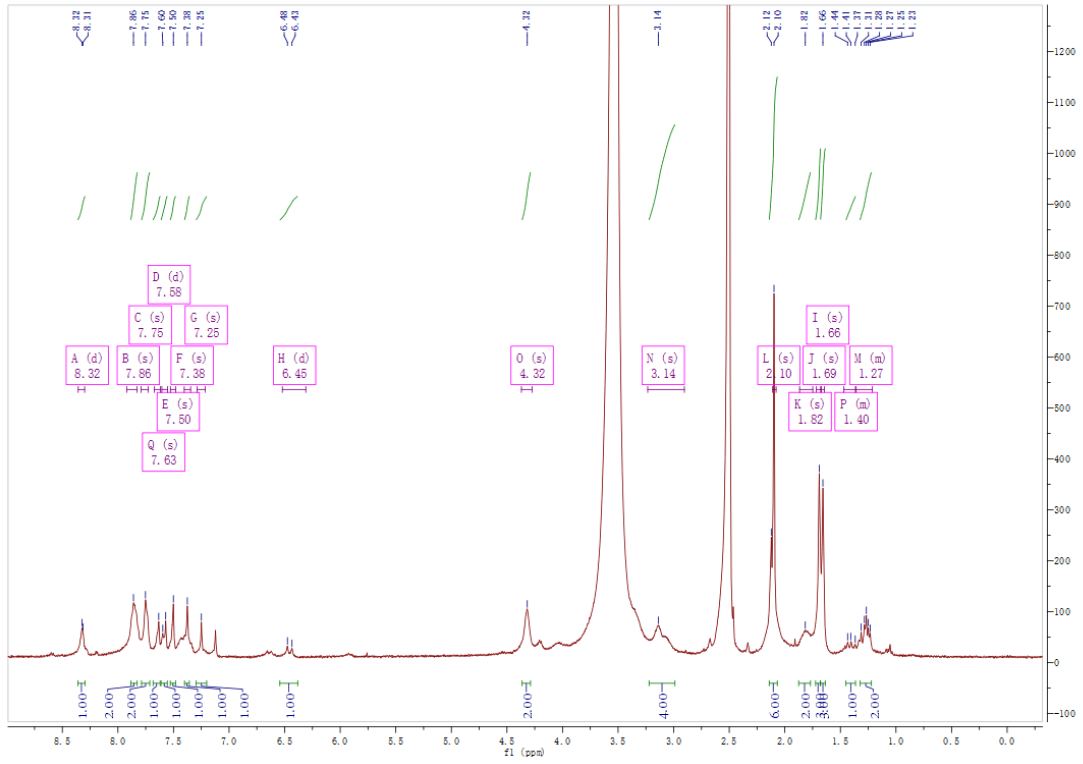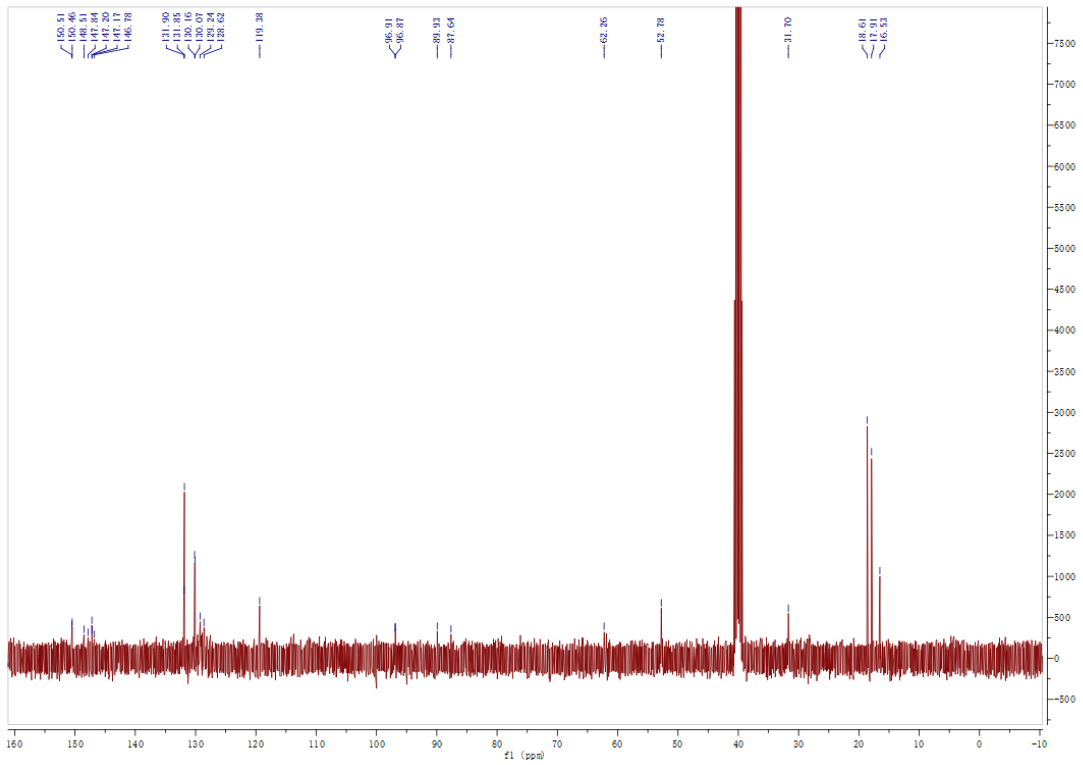

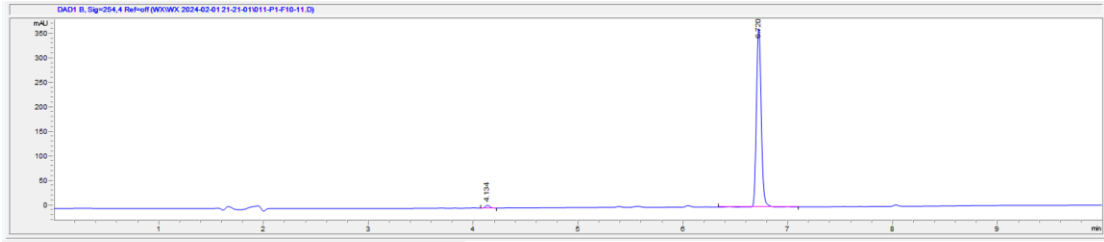

| # | 时间    | 峰面积    | 峰高    | 峰宽     | 峰面积 %  | 对称因子  | 类型   |
|---|-------|--------|-------|--------|--------|-------|------|
| 1 | 4.134 | 16.7   | 5.5   | 0.0473 | 1.417  | 0.907 | VB   |
| 2 | 6.72  | 1161.8 | 365.9 | 0.049  | 98.583 | 0.873 | BB R |
